## Adaptive substitutions underlying cardiac glycoside insensitivity in insects exhibit epistasis *in vivo*

Andrew M. Taverner<sup>1</sup>, Lu Yang<sup>2</sup>, Zackery J. Barile<sup>3,4</sup>, Becky Lin<sup>3,4</sup>, Julie Peng<sup>1</sup>, Ana Pinharanda<sup>5</sup>, Arya Rao<sup>5</sup>, Bartholomew P. Roland<sup>3,4</sup>, Aaron D. Talsma<sup>3,4</sup>, Daniel Wei<sup>3,4</sup>, Georg Petschenka<sup>6</sup>, Michael J. Palladino<sup>3,4,\*</sup> and Peter Andolfatto<sup>5,\*</sup>

1. Lewis-Sigler Institute for Integrative Genomics, Princeton University, Princeton, NJ 08544.
2. Dept. of Ecology and Evolutionary Biology, Princeton University, Princeton, NJ 08544.
3. Dept. of Pharmacology and Chemical Biology, University of Pittsburgh, Pittsburgh, PA 15261.
4. Pittsburgh Institute for Neurodegenerative Diseases (PIND), University of Pittsburgh School of Medicine, Pittsburgh, PA 15261.
5. Department of Biological Sciences, Columbia University, New York, NY 10027
6. Institute for Insect Biotechnology, Justus-Liebig-Universität Gießen, Hesse, Germany

\*Correspondence: Peter Andolfatto, [pa2543@columbia.edu](mailto:pa2543@columbia.edu), Michael Palladino, [mp44@upitt.edu](mailto:mp44@upitt.edu)

Short title: Epistasis among adaptive substitutions *in vivo*

## Abstract

Predicting how species will respond to selection pressures requires identifying the factors that constrain their evolution. The repeated evolution of unrelated herbivorous insects to toxic cardiac glycosides primarily occurs via a small subset of possible functionally-relevant substitutions to Na<sup>+</sup>,K<sup>+</sup>-ATPase. We used genome engineering of *Drosophila* to evaluate the phenotypic effects of frequently observed adaptive substitutions at two sites (111 and 122). Surprisingly, these substitutions exhibit recessive lethality and dominant neural dysfunction. We identify a phylogenetically correlated substitution, A119S, that partially ameliorates the deleterious effects of substitutions at 111 and 122. Despite contributing little to cardiac glycoside-insensitivity *in vitro*, A119S, like substitutions at 111 and 122, substantially increases adult survivorship upon cardiac glycoside exposure. By revealing distinct effects of substitutions *in vitro* and *in vivo*, our results underscore the importance of evaluating the fitness of adaptive substitutions and their interactions in whole organisms.

## Introduction

Understanding the factors that limit the rate of adaptation is central to our ability to forecast future adaptive evolutionary trajectories and predict the timescales over which these changes are expected to occur (Stern 2011; Losos 2017; Morris et al. 2018). In particular, considerable uncertainty surrounds the relative importance of the availability of adaptive mutations, pleiotropy and epistasis in constraining adaptive paths (Stern 2011; Storz 2018). One fruitful approach to addressing this question has been to examine repeated bouts of adaptation in microbial systems subject to a common selective pressure and identical starting conditions (Jerison and Desai 2015). Unfortunately, such approaches still have limited utility in multicellular eukaryotes and likely don't reveal the full range of constraints operating in nature. An alternative and analogous approach is to examine evolutionary patterns in large, naturally occurring assemblages of species exhibiting parallel adaptations in response to a common selective pressure (Liu et al. 2010; Meyer et al. 2018; Zhen et al. 2012; Dobler et al. 2012; Christin et al. 2007). Evolutionary studies of parallelisms are a powerful complementary approach to deducing the factors constraining the adaptation (Stern 2013). A well-known example of parallel adaptations is the ability of numerous animals to acquire toxins from their environments and sequester them for use in defense against predators (Brodie 2009; Erb and Robert 2016).

Here, we focus on a large group of herbivorous insects with a broad phylogenetic distribution that have independently specialized on toxic host plants (Dobler et al. 2011). In addition to other defenses against herbivory, the Apocynaceae and other plant species produce a class of toxic secondary compounds called cardiac glycosides (CGs). CGs are highly toxic to animals because they are potent inhibitors of  $\text{Na}^+, \text{K}^+$ -ATPase (NKA), a ubiquitously expressed enzyme needed in a variety of cellular processes in animals, including neural signal transduction, muscle contraction, and osmoregulation (Lingrel 2010). Mutations to NKA in invertebrates are typically homozygous lethal and associated with defects in locomotion, neuron development and neural homeostasis (Ashmore et al. 2009). In humans, loss-of-function mutations in NKA have been associated with several rare disorders such as dystonia, parkinsonism and hemiplegic migraines (Böttger et al. 2012). Despite their toxicity, NKAs have long been targeted with CG-based drugs to treat common conditions such as congestive heart failure and cardiac arrhythmias (Schoner 2002).

Insensitivity to CGs in insects can evolve via several mechanisms including modification of the CG-binding domain of NKA (i.e. target-site insensitivity), restriction of NKA expression to neurons (Petschenka et al. 2013b), the deployment of proteins that ameliorate the toxic effects of CGs (Torrie et al. 2004; Petschenka et al. 2013b) and other physiological factors (Vaughan and Jungreis 1977). Despite this wide variety of potential paths to CG-insensitivity, the evolution of insensitivity in most CG-adapted insects is due, at least in part, to target-site insensitivity. Indeed, in most cases, diet specialization on CG-containing hostplants has been accompanied by recurrent adaptive amino acid substitutions to the CG-binding domain of the alpha-subunit of NKA,  $\text{ATP}\alpha 1$  (Zhen et al. 2012; Dobler et al. 2012; Yang et al. 2019). Previous studies have identified up to 35 sites in  $\text{ATP}\alpha 1$  at which substitutions could contribute to CG-insensitivity (reviewed in Zhen et al. 2012). However, CG-insensitivity of  $\text{ATP}\alpha 1$  most often arises via a highly similar pattern of substitution at two sites (111 and 122, **Figure 1A**): as an illustration, a survey of 28 CG-adapted insects revealed that 30 of 63 amino acid substitutions

observed at sites implicated in CG-sensitivity in ATP $\alpha$ 1 occur at sites 111 and 122 (Yang et al. 2019). Sites 111 and 122 have also been identified as targets of positive selection in CG-adapted insects using statistical phylogenetic methods (Yang et al. 2019). Understanding why these two sites, in particular, are so often employed requires a characterization of the effects of these substitutions, individually and in combination, on organismal phenotypes and fitness.

To explain the frequent reuse of sites 111 and 122, it has been speculated that substitutions at most alternative sites may be associated with negative pleiotropic effects, that is, have deleterious effects on another aspect of phenotype and fitness (Zhen et al. 2012). Support for this hypothesis comes from the fact that multiple insect species specializing on CG-containing host-plants have independently duplicated and neofunctionalized ATP $\alpha$ 1. In all cases examined to date, species with two or more copies retain one minimally altered copy that is more highly expressed in nervous tissue, and have evolved one or more insensitive copies that are more highly expressed in the gut, the site of absorption of CGs (Zhen et al. 2012; Yang et al. 2019). Further support for negative pleiotropic effects is provided by the expression of engineered ATP $\alpha$ 1 constructs in cell lines, suggesting that some duplicate-specific CG-insensitivity substitutions appear to reduce NKA activity (Dalla and Dobler 2016). Based on these findings, the frequent parallel substitutions observed at sites 111 and 122 in specialists lacking duplicate ATP $\alpha$ 1 copies plausibly reflect the fact that substitutions at these sites are minimally pleiotropic.

### **Common substitutions at positions 111 and 122 exhibit negative pleiotropic effects.**

To test the idea that substitutions at positions 111 and 122 lack strong negative pleiotropic effects, we used the transgenesis toolkit of *Drosophila melanogaster*, a generalist insect that harbors a single ubiquitously expressed copy of a CG-sensitive form of ATP $\alpha$ 1. This sensitive form of ATP $\alpha$ 1 is the presumptive ancestral state for many potential CG-adapted insects. We focus on several substitutions at sites 111 and 122 (notably Q111V, Q111T, N122H, **Figure 1A**) have been directly implicated in CG-insensitivity in functional experiments (reviewed in Zhen et al. 2012). By engineering amino acid substitutions into a single *D. melanogaster* background, we ensure that fitness differences observed among lines are caused by the substitution and not confounded by unknown variation in the genomic background. In addition, we can rule out compensatory changes elsewhere in the genome, or evolved changes in physiology, which are concerns in multi-generation population-level experimental evolution studies. Importantly, by testing substitutions *in vivo*, we can evaluate their functional effects at multiple phenotypic levels, from the biochemistry of enzyme inhibition to behavior and fitness. We generated six lines that carry substitutions at these two sites of the endogenous ATP $\alpha$ 1 locus individually (Q111L, Q111V, Q111T, N122H) and in combination (Q111V+N122H, Q111T+N122H) (see Methods). For comparison, we also created three lines in which we introduced two rare, copy-specific substitutions (C104Y and N122Y and C104Y+N122Y, **Figure 1A**) for which we did not have *a priori* expectations about pleiotropic fitness effects. An additional control line carrying the wild-type *D. melanogaster* allele was generated using the same approach.

Based on the repeated use of substitutions at positions 111 and 122, we expected these would confer ATP $\alpha$ 1 with some degree of insensitivity to CGs and be associated with either no or mild negative pleiotropic effects on fitness. To our surprise, however, each of the nine lines exhibit severely reduced fitness, behaving effectively as recessive lethals. To identify the

developmental stage at which lethality occurs, we evaluated hatchability (i.e. the proportion of homozygous larva per embryo) and the probability of individuals surviving to pupae and adults (**Figure 1B**). Severe fitness deficits for most engineered substitution lines were apparent as early as the larval hatching stage. Still, for most engineered mutant lines, greater than 50% of individuals hatch into the first instar. Q111V homozygotes exhibit particularly high probabilities of survival until the pupal stage. Nonetheless, survivorship of individuals to adulthood for all lines is close to zero.

### **The substitution A119S rescues lethality of substitutions at sites 111 and 122.**

The unexpected deleterious effects of common substitutions at sites 111 and 122 raises the question of how insects with sensitive ATP $\alpha$ 1 isoforms, spanning a broad phylogenetic distribution, can evolve insensitivity to CGs via substitutions to one or both of these sites. An important clue is provided by the observation that *D. subobscura*, a European relative of *D. melanogaster*, carries haplotypes resembling those that we engineered into *D. melanogaster*, including the ancestral (QN) and derived states (QH and VH) at sites 111 and 122, respectively (Pegueroles et al. 2016), and yet are viable. Full length coding sequences for *D. subobscura* (**Methods**) and the closely related sister species *D. guanche* (Puerma et al. 2018) reveal that 19 amino acid substitutions distinguish the *D. melanogaster* ATP $\alpha$ 1 from the ancestral *D. subobscura* protein. We hypothesized that one or more of these substitutions ameliorates the deleterious effects of substitutions at positions 111 and 122.

Using a multiple sequence alignment that includes 161 CG-adapted insects and outgroup species surveyed from six insect orders (**Figures S1 and S2**, **Figure 1A** shows a subset of these taxa), we applied the software BayesTraits (Pagel and Meade 2006) to evaluate the evidence for correlated evolution between sites 111 and 122 and all other variant sites in the protein (**Methods**). Of the divergent sites between *D. melanogaster* and *D. subobscura*, only one site (119) is among those having the strongest phylogenetic correlations with both sites 111 and 122 (top 5% of 270 sites) (**Figure 1C**, **Figure S3**). A substitution at 119 is observed in 90% of the cases in which there is a substitution at 111 and 100% of the cases in which there is a substitution at site 122. *D. melanogaster* retains the ancestral Alanine at this site, whereas the *D. subobscura* and closely-related species harbor a derived Serine substitution.

Though site 119 is not among sites known to affect CG-sensitivity (Zhen et al. 2012), previous work identified it as one of four sites in the protein that underlie a CG-association/dissociation rate difference distinguishing human ATP1A1 and ATP1A2 isoforms (Crambert et al. 2004). Considering the orientation of the amino-acid side chain of site 119 with respect to a bound CG (**Figure S4**), it is unlikely that it plays a direct role in CG binding. Nonetheless, due to its physical proximity to sites 111 and 122 and the evidence for correlated evolution with these sites, we hypothesized that the A119S substitution may compensate for the deleterious effects of substitutions at positions 111 and 122. To test this hypothesis, we generated a second series of substitution lines that include A119S in isolation, and A119S paired with four substitutions at sites 111 and 122 (i.e. Q111L+A119S, Q111V+A119S, Q111T+A119S and A119S+N122H, **Figure 1D**). Embryos homozygous for A119S, with and without substitutions at 111 and 122, have levels of hatchability and survival that are close to wild-type levels. Remarkably, we find that A119S rescues the lethality associated with homozygosity for all four substitutions with which we paired it (i.e. compare **Figure 1D** with

**Figure 1B).** These results establish the existence of epistatic fitness interactions between A119S and multiple substitutions at both 111 and 122.

### **A119S rescues enzyme dysfunction associated with substitutions at sites 111 and 122.**

To gain insight into the functional basis of the fitness interaction between A119S and substitutions at sites 111 and 122 at the level of NKA function, we carried out a series of enzyme inhibition assays (**Figure 2, Figure S5**). For lines that are heterozygous for CG-insensitivity substitutions, Mut/+, we expect to see biphasic inhibition curves reflecting the equilibrium dissociation constants ( $K_d$ ) corresponding to the wild-type (+) and mutant (Mut) forms of the enzyme, respectively. Comparing biphasic curves for heterozygotes allows us to directly compare inhibition profiles for homozygous-inviable substitutions at positions 111 and 122 alone and in combination with A119S. **Figure 2A** details the analysis of the N122H substitution in this context. In isolation, A119S has modest (~1.5-fold) but marginally significant effects on CG inhibition of NKA (t-test on estimated IC<sub>50</sub>s,  $P=0.016$ ). Likewise, N122H/+ heterozygotes exhibit similarly small effects on CG inhibition. This pattern suggests that the N122H substitution in isolation is either not expressed, is substantially less active than the wild-type enzyme or does not confer CG-insensitivity to the enzyme (**Figure 2A**). An analysis of allele-specific expression for all lines indicates close to equal mRNA levels for the two alleles (**Figure S6**), suggesting that the differences in activity are not due to differences at the level of gene expression.

Notably, N122H on the background of A119S produces a substantially more CG-insensitive enzyme than either N122H or A119S in isolation (**Figure 2**). Similar results were obtained in comparisons of Q111V and Q111V+A119S (**Figure S5**). We estimate the level of CG-insensitivity conferred by Q111L, Q111V, Q111T and N122H, in the presence of A119S, to be 8, 13, 40 and 200-fold greater than the wild-type form of the enzyme, respectively (**Figure 2B**). Our results demonstrate epistasis between substitutions at sites 119 and 111/122 at the level of enzyme function. Previous studies have demonstrated increased survival of cell lines expressing Q111V, N122H, and Q111T+Q111H (Dobler et al. 2012), and substantial insensitivity to CG-inhibition despite little effect on ATPase activity for N122H, Q111T+Q111H and Q111V+Q111H (Dalla et al. 2013; Dalla and Dobler 2016). Given that these substitutions were engineered on a *D. melanogaster* background lacking A119S, our results suggest such substitutions are likely to be associated with substantial enzyme dysfunction.

### **A119S rescues neural dysfunction associated with substitutions at sites 111 and 112 *in vivo*.**

An advantage of functionally testing the effects of amino acid substitutions *in vivo*, as opposed to *in vitro*, is the ability to examine fitness-related phenotypes at multiple levels. We therefore considered the impact of substitutions, alone and in combination, on higher level fitness-related phenotypes including adult behavior in response to stress and survivorship of adult flies exposed to CGs.

NKA plays a central role in maintaining neuron action potentials and previous studies have documented short-term paralysis following mechanical overstimulation (aka “bang sensitivity”) associated with mutations that reduce this enzyme’s activity (Ganetzky and Wu 1982; Schubiger et al. 1994; Davis et al. 1995; Palladino et al. 2003). As such, we used the bang sensitivity phenotype as a proxy for proper neural function. Examining our panel of substitutions for these effects reveals all of the substitutions we engineered at sites 111 and 122, individually



and in combination, exhibit dominant bang sensitivity phenotypes that are similar in severity to those of the loss-of-function deletion  $\Delta 2-6b$  (**Figure 3A, Figure S7**). In contrast, bang sensitivity phenotypes were indistinguishable from wild-type for all heterozygous substitutions at 111 and 122 in combination with A119S (**Figure 3A, Figure S8**). Interestingly, individuals homozygous for A119S, and substitutions at 111 and 122 in the presence of A119S, still exhibit obvious neural dysfunction relative to the wildtype (**Figure 3, Figure S8**). Thus, while A119S is itself associated with recessive pleiotropic effects, our results demonstrate some degree of positive epistasis between A119S and substitutions at sites 111 and 122 when considering the level of adult behavior.

#### **Substitutions at sites 111, 119 and 122 increase adult survival upon exposure to CGs.**

*D. melanogaster* do not normally consume CG-containing plants and consumption of CGs results in increased mortality (Groen et al. 2017). Given that substitutions at sites 111 and 122 decrease sensitivity to CG-inhibition of NKA, such substitutions should confer an advantage upon exposure of *D. melanogaster* to CGs. To test this hypothesis, we exposed adult animals to media containing the CG ouabain. While the wild-type strain suffers high levels of mortality upon CG exposure, the lines carrying substitutions at sites 111 and 122 in combination with A119S are all substantially less-sensitive (**Figure 4, Figure S9**). Notably, the survival probability of A119S+N122H (SH/+ and SH/SH) is indistinguishable from control treatments in exposures with up to 10 mM ouabain. Beyond confirming an association between insensitivity to CG-inhibition of enzyme activity *in vitro* and reduced sensitivity to CG-exposure *in vivo*, two additional important findings arise from these experiments. First, a substantial measure of insensitivity to CG-exposure is also conferred by A119S alone (~30-fold lower relative risk than wild-type at 5 mM ouabain, **Figure 4**), despite it having only a small effect on NKA sensitivity to CG-inhibition (**Figure 2**). Further, the substantially improved survival of heterozygous strains relative to the wild-type strain, including to some extent A119S/+, suggests that insensitivity to CG exposure is a partially dominant phenotype (**Figure 4, Figure S9**). Importantly, despite the lethal homozygous effects of Q111V and N122H individually (**Figure 1B**), the dominant effects of these substitutions on insensitivity to CG-exposure imply that they have the potential to confer a fitness advantage as heterozygotes in CG-rich environments.

#### **Implications for the evolution of CG-insensitivity in insects.**

Our findings carry important implications for how CG-insensitivity evolves in insects. At the onset of this study, we expected minimal negative pleiotropic effects associated with adaptive substitutions at sites 111 and 122, given their frequent parallel occurrence across insect orders (Zhen et al. 2012). Our findings that these substitutions are associated with negative pleiotropic effects at multiple levels (i.e. enzyme function, neural function and viability) reveals a more complicated explanation. As we show, with few exceptions, adaptive substitutions conferring CG-insensitivity at sites 111 and 122 most often arise on a genetic background that includes a substitution at site 119, a site not previously implicated in CG-sensitivity. We further show that the most commonly observed substitution at sites 119, A119S, rescues the lethality associated with substitutions at sites 111 and 122, as well as their dominant effects on neural function. A second common substitution, A119N, appears independently in three insect orders and may act similarly (**Figure 1A, Figure S2**). Thus, the repeated use of specific substitutions does not mean

that these changes unconditionally lack negative pleiotropic consequences and that their fitness advantage can depend critically on the background on which they arise.

To the extent that *D. melanogaster* represents a typical CG-sensitive species, it is clear that substitutions at positions 111 and 122 would not be permitted to fix in the species without being preceded by A119S or an equivalent permissive substitution. A119S was not detected in extensive mutagenesis screens (Zhen et al. 2012) and has only modest effects on CG-inhibition of NKA *in vitro* (**Figure 2**). Given these findings and its position and orientation in the NKA-ouabain co-crystal structure (**Figure S4**), one might assume that A119S is a neutral (or nearly-neutral) permissive substitution that renders some species candidates for the adaptation to CGs by chance. However, our ability to examine the effects of A119S, and interacting substitutions, in the context of whole animal phenotypes reveals a remarkably different picture. In particular, we show that homozygosity for A119S results in substantial levels of neural dysfunction (**Figure 3**). Despite these detrimental effects, we also find that A119S, even when heterozygous, confers a substantial survival advantage upon exposure to CGs. Such insights could only be provided by evaluating the effects of mutations in the context of the whole organism. Investigating just one aspect of phenotype, for example biochemistry *in vitro*, yielded a misleading picture of the fitness advantages, and disadvantages, that likely operate on the individual amino acid substitutions underlying this adaptation.

Our findings raise the question of how, given its deleterious effects, A119S became established in so many species. Initially, a survival advantage conferred by A119S in CG-rich environments may have outweighed deleterious effects associated with homozygosity for this substitution. This may be especially true for insects that specialized on CG-containing plants, where competition with other species for resources is reduced. In multiple lineages, the substitutions A119S and A119N preceded substitutions to 111 and 122 (Hemiptera, Hymenoptera, Diptera). In *Drosophila*, where we have the greatest phylogenetic resolution, A119S was established before substitutions to sites 111 and 122 in the evolutionary lineage leading to *D. subobscura*. This said, Q111L is sometimes observed in the absence of A119S (as is Q111E, see **Figure 1A**: *Bemisa tabaci* and *Lophocarya caryae*; not shown are *Aedes aegypti*, *Mechanitis polymia* and *Empyreuma pugione*, see **Figure S2**) implying alternative permissive substitutions in these taxa. More generally, A119S is not a particularly uncommon substitution among taxa that do not specialize on CG-containing hostplants (**Figure S2**), again implying the existence of additional compensatory substitutions in these species. None of the 18 sites distinguishing the *D. subobscura* and *D. melanogaster* proteins appear among sites most highly correlated with A119S in a phylogenetic analysis, however, leaving us few clues about promising candidates (**Figure S3**).

This said, a model invoking serial substitution of A119S and compensatory mutations is not the only plausible scenario. Alternatively, since CG-insensitive haplotypes substitutions including A119S lack strong deleterious effects when heterozygous (**Figure 3**, **Figure S8**), such haplotypes may be maintained over time in the heterozygous state at low frequency and subsequently reach fixation as they accumulate a sufficient number of compensatory substitutions (Kimura 1985). Interestingly, *D. subobscura* is polymorphic for substitutions at positions 111 and 122 mediating CG-insensitivity and these haplotypes are associated with polymorphic inversions that may rarely be homozygous (Pegueroles et al. 2016). The evolution of CG-insensitivity in *D. subobscura* may be recent and represent a transient stage in the evolution of this adaptive trait.



Our study adds to a growing body of work linking epistasis to the dynamics of adaptive evolution in contexts where the ecological relevance of the phenotype is well-understood (Tarvin et al. 2017; McGlothlin et al. 2016; Tufts et al. 2015; Kumar et al. 2017). To date, however, epistasis among substitutions in a protein has been evaluated *in silico*, *in vitro*, and in microbes along the dimensions of either protein folding stability, ligand specificity, enzyme activity, or cell growth rates (Storz 2016). While it is tempting to use one axis of the mutation-phenotype map as a convenient proxy for fitness (e.g. *in vitro* studies of the effects of mutations on protein function), the actual effect of a given mutation on fitness is a convolution over multiple phenotypes, from the levels of enzyme and tissue function to that of whole organism fitness in its environment. By considering phenotypic effects both *in vitro* and *in vivo*, we demonstrate how dominance and epistasis of amino acid substitutions can be missed or mischaracterized in the absence of a whole animal model to evaluate these effects. As such, our study reveals surprising new features of adaptive amino acid substitutions that were previously inaccessible.

## Methods.

### Sequencing and alignments.

Sources of data used in this study are detailed in **Table S1**. We collected new data for three species: *Drosophila subobscura* (Diptera), *Monophadnus latus* (Hymenoptera), and *Syntomeida epilais* (Lepidoptera). In each case, total RNA was extracted using TRIzol (Ambion, Life Technologies) following the manufacturer's protocol. RNA-seq libraries were prepared with either the TruSeq RNA Library Prep Kit v.2 (Illumina) or TruSeq Stranded RNA Library Prep Gold (Illumina) and sequenced on HiSeq2500 (Genomics Core Facility, Princeton, NJ, USA). 50-55 million paired-end 150 nucleotide reads per library were trimmed for quality (Phred quality  $\geq 20$ ) and length ( $\geq 30$  contiguous bases). Trinity 2.2.0 (Haas et al. 2013) was used for *de novo* transcriptome assembly using default parameters. The ATP $\alpha$ 1 coding sequences of *D. melanogaster* (FBgn0002921) and *B. mori* (GenBank: LC029030.1) were used to query the assembled transcripts using either tblastx or tblastn (blast-2.26). For *Dysdercus cingulatus* (Hemiptera), *Macrocheraia grandis* (Hemiptera), *Largus californicus* (Hemiptera), *Jalysus sp.* (Hemiptera), *Metatropis rufescens*, *Ischnodemus falicus*, *Geocoris sp.*, *Gyndes sp.*, *Monomorium pharaonis*, *Hylobius abietis*, *Megacyllene caryae*, *Calligrapha philadelphia*, and *Basilepta melanopus*, we downloaded raw RNA-seq data, carried out *de novo* assembly and obtained ATP $\alpha$ 1 sequences using methods similar to those described above. The remaining ATP $\alpha$ 1 sequences were either previously published or obtained from publicly available genome references assemblies. A multiple nucleotide sequence alignment was created using ClustalOmega (Sievers et al. 2011). Two alternatively spliced exons were masked for subsequent phylogenetic analyses.

### Statistical phylogenetic analyses.

Phylogenetic relationships were established based on previously published sources (**Table S2**). Phylogeny branch lengths were estimated using IQtree (Nguyen et al. 2015) on the nucleotide alignment of 174 ATP $\alpha$ 1 sequences representing 161 species sampled from 8 insect orders (**Figure S2**) using a guide phylogeny (**Figures S1**) to force species branching order within orders. We carried out a comprehensive search for substitutions at ATP $\alpha$ 1 on which substitutions at sites 111 and 122 were dependent using BayesTraits (Pagel and Meade 2006). We first reconstructed the ancestral sequences of ATP $\alpha$ 1 using PAML (Yang 2007). As inputs, we provided PAML with the phylogeny with branch lengths and the amino acid alignment for ATP $\alpha$ 1. We used the default PAML parameters with the following changes: "cleandata" was set to 0 to preserve sites with missing data; "fix\_blength" was set to 1 to use the branch lengths as the initial values in the ancestral reconstruction; "method" was set to 1 to use a new algorithm in PAML that updates branch lengths one-by-one. Using the inferred ancestor, we then binarized each amino acid state in the multi-species alignment into ancestral, "0", and derived, "1", and used this, and the phylogeny with branch lengths as the input for BayesTraits. BayesTraits fits a continuous-time Markov model to estimate transition rates between discrete, binary traits and calculates the likelihood of the fitted model. Restricting rate parameters appropriately (see below), we tested whether the transition rates for sites 111 and 122 were dependent on the state at all other variant sites. We excluded 56 sites with just a single substitution (i.e. one instance in 174 sequences in the alignment) due to their low information content.

In all models, double transition rates (e.g. Q111V and A119S occurring at the same time) were set to zero as double transitions are highly unlikely to occur in a single step and can be modeled as two single transitions, following Pagel (1994). Additionally, we set all transition rates from the derived state back to the ancestral state to zero as failing to do this resulted in unrealistically high estimates of the reversion rate. After these restrictions were imposed, the null model (i.e. independence) had four transition parameters. To test the dependence between sites, we refit an alternative model with two additional restrictions: one forcing the transition rate at site 1 to be fixed regardless of the state of site 2, and a second forcing the transition rate at site 2 to be fixed regardless of the state of site 1. This effectively tests whether the transition rate is affected by the state of either site.

Following the BayesTraits manual recommendations, the phylogeny branch lengths were scaled using BayesTraits to have a mean length of 0.1. Additionally, to increase the chance of finding the true maximum likelihood, we set MLTries to 250 which controls the number of times BayesTraits calls the maximum likelihood algorithm, returning the maximum likelihood of the 250 attempts. We ran each pair 25 times and checked that at least half of the runs had equivalent maximum likelihoods (within 0.1) to ensure that the results were stable. Taking the maximum likelihood for each pair, for each model, we calculated p-values using the LRT, where the statistic of merit is: 2 (unrestricted model – restricted model). The LRT statistic is distributed chi-squared with degrees of freedom (df) equal to the number of restrictions imposed on the model (df=2).

Engineering ATP $\alpha$  amino-acid substitution lines.

To test for phenotypic effects associated with candidate amino-acid substitutions, we developed a genetic engineering approach of the endogenous *ATP $\alpha$ 1* (CG5670) locus in *Drosophila melanogaster*. Employing a strategy similar to that of Roland et al. (2013), we first generated a “founder line” by deletion of exons 2-6b and replacement with a functional *attP* element using ends-out homologous recombination (**Figure S10**). To generate the founder line, homology arms were generated as 2-3 kilobase PCR amplicons 5’ of exon 2 and 3’ of exon 6b and inserted into the *pGX-attP* vector (Huang et al. 2009). This construct was injected into *w<sup>1118</sup>* embryos using standard protocols for P-element transgenesis (Rainbow Transgenic Flies, Inc.). Ends out recombination was performed and molecularly confirmed. The *mini-white* gene was subsequently removed by Cre-lox mediated excision (Groth et al. 2004) to create the founder line, *w<sup>1118</sup>;ATP $\alpha$  $\Delta$ 2-6b attP/TM6B,Tb1* (exons 2-6b were replaced by a functional *attP* site).

To generate allelic variant lines of ATP $\alpha$ 1, we cloned exons 2-6b into *pGX-attB-ATP $\alpha$ 2-6b* vector and injected it into the *attP* founder line mated to *vasa-phiC31-ZH2A* flies using standard protocols (Rainbow Transgenic Flies, Inc). The unmodified plasmid was to generate a wild-type control (*GE-ATP $\alpha$ - $\Delta$ 2-6b-WT*) following Cre-lox reduction of the *mini-white*. We then used site-directed mutagenesis (Quick-change Lightning, Agilent) to generate a panel of amino-acid substitution variants of *pGX-attB-ATP $\alpha$ 2-6b* and corresponding GE strains were generated and Cre-lox reduced, as above for the WT control (**Table S3**). Variant and control lines were balanced by crossing to *w;;Dr[1]/TM6B, P{w[+mC]=Dfd-EYFP}3, Sb<sup>1</sup>, Tb<sup>1</sup>, ca<sup>1</sup>* (Bloomington Stock Center line 8704) and selecting for EYFP florescence. Homozygous variant GE-ATP $\alpha$  lines were established, when possible, by sib-mating and

selection of non-florescent  $Tb^+, Sb^+$  larvae. All substitutions were confirmed using PCR and Sanger-based sequencing.

#### Viability assays.

Viability was measured in three ways. First, we measured viability as the relative hatchability of embryos carrying a given homozygous amino acid substitution (hereafter “Mut”). To do this, we self-crossed each balanced  $GE-ATP\alpha-\Delta 2-6b-Mut/TM6B, P\{w[+mC]=Dfd-EYFP\}3, Sb^1, Tb^1, ca^1$  and allowed them to lay fertilized eggs on standard apple juice–agar Petri plates with yeast paste for two hours at 25°C, 50% humidity. After 24 hours, the relative proportion of non-EYFP (i.e. homozygous  $Mut/Mut$ ) to EYFP (i.e. heterozygous  $Mut/+$ ) first instar larvae were counted. As a control, we generated  $GE-ATP\alpha-\Delta 2-6b-WT/TM6B, P\{w[+mC]=Dfd-EYFP\}3, Sb^1, Tb^1$  parents and followed the same procedure. A second measure of viability is the probability of survival of a first instar  $Mut/Mut$  larvae to adulthood. To measure this, we transferred homozygous ( $Mut/Mut$ ) first instar larvae to fly media vials (recipe R, LabExpress, Ann Arbor, MI). Larval density was limited to 10 per vial and vials were kept at 25°C, 50% humidity. After two weeks, we counted the number of emerging adults. Homozygous  $GE-ATP\alpha-\Delta 2-6b-WT$  first instar larvae generated the same way were used as a control. Third, we measured egg-to-adult fitness as the proportion of emerging  $Mut/Mut$  adults in media bottles (recipe B, LabExpress, Ann Arbor, MI) seeded with  $GE-ATP\alpha-\Delta 2-6b-Mut/TM6B, P\{w[+mC]=Dfd-EYFP\}3, Sb^1, Tb^1, ca^1$  parents and used bottles seeded with  $+/TM6B, P\{w[+mC]=Dfd-EYFP\}3, Sb^1, Tb^1, ca^1$  parents as controls.

#### Enzyme inhibition assays.

For each *D. melanogaster* substitution line, we homogenized 90 heads (previously stored at -80°C) in 900 µl of deionized water, using a 1 ml glass grinder (Wheaton) chilled on ice (Petschenka et al. 2017). After vortexing, we divided homogenates into three aliquots of 300 µl representing technical replicates. Subsequently, samples were frozen at -80°C and freeze-dried (Christ, Alpha 2-4 LDPlus) overnight. For assessing resistance of NKA to ouabain, we followed the procedure as described in (Petschenka et al. 2013a) that is based on the photometric evaluation of phosphate released from enzymatic hydrolysis of adenosine triphosphate (ATP) as a measure of NKA activity. Lyophilisates were stored at -80°C until use and reconstituted with 500 µl deionized water. Head extractions were incubated at increasing concentrations of the water-soluble standard cardenolide ouabain ( $10^{-8}$  M to  $2 \times 10^{-3}$  M, Sigma, Germany, O3125-1G) at 37°C under the following conditions: 100 mM NaCl, 20 mM KCl, 4 mM MgCl<sub>2</sub>, 50 mM imidazol, and 2.5 mM ATP (pH 7.4). We corrected all measurements for a background value that we obtained by incubating the extract under the same conditions as above, except with the addition of  $2 \times 10^{-3}$  M ouabain and no KCl (i.e., NKA inactive). On each microplate, we included an assay with porcine Na<sup>+</sup>/K<sup>+</sup>-ATPase (Sigma, Germany, A7510-5UN) as an internal standard. In addition, we ran a series of KH<sub>2</sub>PO<sub>4</sub> dilutions as a phosphate calibration curve on every plate. We measured absorbances at 700 nm using a CLARIOstar microplate reader (BMG Labtech, Germany). We carried out three biological replicates per line based on different extractions of fly heads. Each biological replicate was the average of three technical replicates, i.e. measurements based on aliquots from original extracts. For data analysis, we compared all measurements to a non-inhibited control. We fitted inhibition curves using OriginPro 2017

(OriginLab, Northampton, MA) with top and bottom asymptotes set to 100 and 0, respectively. Alternatively, we used least-squares fitting to the bi-phasic curve function,

$$y = f \left( 1 - \frac{[I]}{[I] + IC_{50,1}} \right) + (1 - f) \left( 1 - \frac{[I]}{[I] + IC_{50,2}} \right),$$

where  $IC_{50,1}$  and  $IC_{50,2}$  represent the inhibitor concentration  $[I]$  required for 50% activity of each isoform present in proportions  $f$  and  $(1-f)$ , respectively. Setting  $f=0$  assumes a homogenous population of enzyme as expected for homozygotes. The two methods yielded similar  $IC_{50}$  estimates.

#### Targeted allele-specific expression.

To estimate relative expression of mutant and wild-type alleles in heterozygous strains, we designed a targeted allele-specific expression (ASE) assay. Genomic DNA (gDNA) and total RNA were extracted sequentially using TRIzol Reagent (Invitrogen 15596026 and 15596018) from three replicate pools of 20 males sampled from each of sixteen lines. Extracted RNA was further purified with Qiagen RNeasy column (Qiagen 74104) and reverse transcribed into cDNA with the use of random primers and ProtoScript II Reverse Transcriptase (NEB M0368S). Two sets of primers for  $ATP\alpha 1$  were designed and used in subsequent PCR, multiplexing and sequencing. The first set were designed as exon-primed intron crossing (EPIC, Racle et al. 2017) primers and span a short intron separating exons 2 and 3. A second set of primers was used to add standard Illumina-like i5 and i7 barcodes to the PCR amplicons to facilitate multiplexing and subsequent sequencing. These multiplexed amplicons were pooled and sequenced on an Illumina MiSeq (Princeton Microarray Facility) and yielded ~1 million 150 nucleotide paired-end reads. Reads were mapped to gDNA and cDNA reference sequences using Tophat2 (Kim et al. 2013) and a Variant Calling File (VCF) file was produced using the GATK pipeline (McKenna et al. 2010). Allele counts at focal sites (104, 111 and 122) for both cDNA and gDNA were generated using a custom script. ASE was estimated using the Cochran-Mantel-Haenzel framework as implemented in R (`mantelhaen.test`). Specifically, ASE is estimated as the relative risk of the mutant substitution in the cDNA population using allele counts from gDNA as a reference population.

#### Behavioral phenotyping.

We quantified “bang sensitivity” which is a measure of susceptibility to seizures and paralysis upon mechanical over-stimulation (Ganetzky and Wu 1982). As such, the bang sensitivity phenotype is a measure of proper neuron function. Individual flies were placed in an empty fly media vial and vortexed at the maximum setting for 20 seconds. Immediately following mechanical overstimulation, neurologically dysfunctional flies typically experience a period of convulsions and seizures. The recovery time was recorded as the time for each fly to right itself. Male flies were assayed 14 days post-eclosion. Approximate 95% confidence intervals were estimated around means by bootstrap resampling with replacement. Recovery time distributions were compared using a Wilcoxon two-sample rank sum test with continuity correction as implemented in R (`wilcox.test`).

#### CG exposure assay.

As a measure of the ability to tolerate CGs, we exposed adult flies (1-7 days post-eclosion) to media containing known concentrations of the CG ouabain. 1.5 grams of



*Drosophila* instant media (Carolina Biological Supply) was reconstituted in a plastic vial with 7 mL of either 0, 5, 10 or 20 mM ouabain. After food solidified (30 min), a small paper wick was added. Three replicates of 10 males and 10 females were kept in each vial at 25°C and 50% humidity. Mortality was measured after 7 days. The genetically engineered wild-type line was used as a control. The Cochran-Mantel-Haenzel test framework (implemented in R) was used to assess significant differences between treatments (i.e. 5/10/20 mM ouabain versus no ouabain), as well as estimates and 95% confidence bounds for the relative risk associated with treatment. Odds ratios (*OR*) estimated using this framework were converted into relative risk (*RR*) estimates using the formula,  $RR = OR / (1 - p + p(OR))$ , where *p* is the risk in the no ouabain control group.

## References.

- Ashmore LJ, Hrizo SL, Paul SM, Van Voorhies WA, Beitel GJ, Palladino MJ. 2009. Novel mutations affecting the Na, K ATPase alpha model complex neurological diseases and implicate the sodium pump in increased longevity. *Hum Genet* **126**: 431–447.
- Böttger P, Doğanlı C, Lykke-Hartmann K. 2012. Migraine- and dystonia-related disease-mutations of Na<sup>+</sup>/K<sup>+</sup>-ATPases: Relevance of behavioral studies in mice to disease symptoms and neurological manifestations in humans. *Neurosci Biobehav Rev* **36**: 855–871.
- Brodie ED. 2009. Toxins and venoms. *Curr Biol* **19**: R931–R935.
- Christin P-A, Salamin N, Savolainen V, Duvall MR, Besnard G. 2007. C4 Photosynthesis Evolved in Grasses via Parallel Adaptive Genetic Changes. *Curr Biol* **17**: 1241–1247.
- Crambert G, Schaer D, Roy S, Geering K. 2004. New Molecular Determinants Controlling the Accessibility of Ouabain to Its Binding Site in Human Na,K-ATPase  $\alpha$  Isoforms. *Mol Pharmacol* **65**: 335–341.
- Dalla S, Dobler S. 2016. Gene duplications circumvent trade-offs in enzyme function: Insect adaptation to toxic host plants. *Evol Int J Org Evol* **70**: 2767–2777.
- Dalla S, Swarts HGP, Koenderink JB, Dobler S. 2013. Amino acid substitutions of Na,K-ATPase conferring decreased sensitivity to cardenolides in insects compared to mammals. *Insect Biochem Mol Biol* **43**: 1109–1115.
- Davis MW, Somerville D, Lee RY, Lockery S, Avery L, Fambrough DM. 1995. Mutations in the *Caenorhabditis elegans* Na,K-ATPase alpha-subunit gene, *eat-6*, disrupt excitable cell function. *J Neurosci* **15**: 8408–8418.
- Dobler S, Dalla S, Wagschal V, Agrawal AA. 2012. Community-wide convergent evolution in insect adaptation to toxic cardenolides by substitutions in the Na,K-ATPase. *Proc Natl Acad Sci U S A* **109**: 13040–13045.
- Dobler S, Petschenka G, Pankoke H. 2011. Coping with toxic plant compounds – The insect’s perspective on iridoid glycosides and cardenolides. *Phytochemistry* **72**: 1593–1604.
- Erb M, Robert CA. 2016. Sequestration of plant secondary metabolites by insect herbivores: molecular mechanisms and ecological consequences. *Curr Opin Insect Sci* **14**: 8–11.
- Ganetzky B, Wu CF. 1982. *Drosophila* mutants with opposing effects on nerve excitability: genetic and spatial interactions in repetitive firing. *J Neurophysiol* **47**: 501–514.
- Groen SC, LaPlante ER, Alexandre NM, Agrawal AA, Dobler S, Whiteman NK. 2017. Multidrug transporters and organic anion transporting polypeptides protect insects against the toxic effects of cardenolides. *Insect Biochem Mol Biol* **81**: 51–61.
- Groth AC, Fish M, Nusse R, Calos MP. 2004. Construction of transgenic *Drosophila* by using the site-specific integrase from phage  $\phi$ C31. *Genetics* **166**: 1775–1782.
- Haas BJ, Papanicolaou A, Yassour M, Grabherr M, Blood PD, Bowden J, Couger MB, Eccles D, Li B, Lieber M, et al. 2013. De novo transcript sequence reconstruction from RNA-seq using the Trinity platform for reference generation and analysis. *Nat Protoc* **8**: 1494–1512.
- Jerison ER, Desai MM. 2015. Genomic investigations of evolutionary dynamics and epistasis in microbial evolution experiments. *Curr Opin Genet Dev* **35**: 33–39.
- Kim D, Pertea G, Trapnell C, Pimentel H, Kelley R, Salzberg SL. 2013. TopHat2: accurate alignment of transcriptomes in the presence of insertions, deletions and gene fusions. *Genome Biol* **14**: R36.

- Kimura M. 1985. The role of compensatory neutral mutations in molecular evolution. *J Genet* **64**: 7.
- Kumar A, Natarajan C, Moriyama H, Witt CC, Weber RE, Fago A, Storz JF. 2017. Stability-Mediated Epistasis Restricts Accessible Mutational Pathways in the Functional Evolution of Avian Hemoglobin. *Mol Biol Evol* **34**: 1240–1251.
- Lingrel JB. 2010. The Physiological Significance of the Cardiotonic Steroid/Ouabain-Binding Site of the Na,K-ATPase. *Annu Rev Physiol* **72**: 395–412.
- Liu Y, Cotton JA, Shen B, Han X, Rossiter SJ, Zhang S. 2010. Convergent sequence evolution between echolocating bats and dolphins. *Curr Biol CB* **20**: R53-54.
- Losos JB. 2017. *Improbable Destinies: Fate, Chance, and the Future of Evolution*. First Edition edition. Riverhead Books, New York.
- Matos-Cruz V, Schneider ER, Mastrotto M, Merriman DK, Bagriantsev SN, Gracheva EO. 2017. Molecular Prerequisites for Diminished Cold Sensitivity in Ground Squirrels and Hamsters. *Cell Rep* **21**: 3329–3337.
- McGlothlin JW, Kobiela ME, Feldman CR, Castoe TA, Geffeney SL, Hanifin CT, Toledo G, Vonk FJ, Richardson MK, Brodie ED, et al. 2016. Historical Contingency in a Multigene Family Facilitates Adaptive Evolution of Toxin Resistance. *Curr Biol CB* **26**: 1616–1621.
- McKenna A, Hanna M, Banks E, Sivachenko A, Cibulskis K, Kernytsky A, Garimella K, Altshuler D, Gabriel S, Daly M, et al. 2010. The Genome Analysis Toolkit: a MapReduce framework for analyzing next-generation DNA sequencing data. *Genome Res* **20**: 1297–1303.
- Meyer WK, Jamison J, Richter R, Woods SE, Partha R, Kowalczyk A, Kronk C, Chikina M, Bonde RK, Crocker DE, et al. 2018. Ancient convergent losses of Paraoxonase 1 yield potential risks for modern marine mammals. *Science* **361**: 591–594.
- Morris DH, Gostic KM, Pompei S, Bedford T, Łuksza M, Neher RA, Grenfell BT, Lässig M, McCauley JW. 2018. Predictive Modeling of Influenza Shows the Promise of Applied Evolutionary Biology. *Trends Microbiol* **26**: 102–118.
- Nguyen L-T, Schmidt HA, von Haeseler A, Minh BQ. 2015. IQ-TREE: A Fast and Effective Stochastic Algorithm for Estimating Maximum-Likelihood Phylogenies. *Mol Biol Evol* **32**: 268–274.
- Pagel M. 1994. Detecting correlated evolution on phylogenies: a general method for the comparative analysis of discrete characters. *Proc R Soc Lond B Biol Sci* **255**: 37–45.
- Pagel M, Meade A. 2006. Bayesian Analysis of Correlated Evolution of Discrete Characters by Reversible-Jump Markov Chain Monte Carlo. *Am Nat* **167**: 808–825.
- Palladino MJ, Bower JE, Kreber R, Ganetzky B. 2003. Neural Dysfunction and Neurodegeneration in *Drosophila* Na<sup>+</sup>/K<sup>+</sup> ATPase Alpha Subunit Mutants. *J Neurosci* **23**: 1276–1286.
- Pegueroles C, Ferrés-Coy A, Martí-Solano M, Aquadro CF, Pascual M, Mestres F. 2016. Inversions and adaptation to the plant toxin ouabain shape DNA sequence variation within and between chromosomal inversions of *Drosophila subobscura*. *Sci Rep* **6**: 23754.
- Petschenka G, Fandrich S, Sander N, Wagschal V, Boppré M, Dobler S. 2013a. Stepwise evolution of resistance to toxic cardenolides via genetic substitutions in the Na<sup>+</sup>/K<sup>+</sup> -ATPase of milkweed butterflies (Lepidoptera: Danaini). *Evol Int J Org Evol* **67**: 2753–2761.

- Petschenka G, Pick C, Wagschal V, Dobler S. 2013b. Functional evidence for physiological mechanisms to circumvent neurotoxicity of cardenolides in an adapted and a non-adapted hawk-moth species. *Proc R Soc B Biol Sci* **280**.  
<https://www.ncbi.nlm.nih.gov/pmc/articles/PMC3619502/> (Accessed March 18, 2019).
- Petschenka G, Wagschal V, von Tschirnhaus M, Donath A, Dobler S. 2017. Convergently Evolved Toxic Secondary Metabolites in Plants Drive the Parallel Molecular Evolution of Insect Resistance. *Am Nat* **190**: S29–S43.
- Puerma E, Orengo DJ, Cruz F, Gómez-Garrido J, Librado P, Salguero D, Papaceit M, Gut M, Segarra C, Alioto TS, et al. 2018. The High-Quality Genome Sequence of the Oceanic Island Endemic Species *Drosophila guanache* Reveals Signals of Adaptive Evolution in Genes Related to Flight and Genome Stability. *Genome Biol Evol* **10**: 1956–1969.
- Racle J, Jonge K de, Baumgaertner P, Speiser DE, Gfeller D. 2017. Simultaneous enumeration of cancer and immune cell types from bulk tumor gene expression data. *eLife*.  
<https://elifesciences.org/articles/26476> (Accessed April 22, 2019).
- Roland BP, Stuchul KA, Larsen SB, Amrich CG, Vandemark AP, Celotto AM, Palladino MJ. 2013. Evidence of a triosephosphate isomerase non-catalytic function crucial to behavior and longevity. *J Cell Sci* **126**: 3151–3158.
- Schoner W. 2002. Endogenous cardiac glycosides, a new class of steroid hormones. *Eur J Biochem* **269**: 2440–2448.
- Schubiger M, Feng Y, Fambrough DM, Palka J. 1994. A mutation of the drosophila sodium pump  $\alpha$  subunit gene results in bang-sensitive paralysis. *Neuron* **12**: 373–381.
- Sievers F, Wilm A, Dineen D, Gibson TJ, Karplus K, Li W, Lopez R, McWilliam H, Remmert M, Söding J, et al. 2011. Fast, scalable generation of high-quality protein multiple sequence alignments using Clustal Omega. *Mol Syst Biol* **7**: 539.
- Stern DL. 2011. *Evolution, Development and the Predictable Genome*. Roberts and Company Publishers, Greenwood Village, CO.
- Stern DL. 2013. The genetic causes of convergent evolution. *Nat Rev Genet* **14**: 751–764.
- Storz JF. 2016. Causes of molecular convergence and parallelism in protein evolution. *Nat Rev Genet* **17**: 239–250.
- Storz JF. 2018. Compensatory mutations and epistasis for protein function. *Curr Opin Struct Biol* **50**: 18–25.
- Tarvin RD, Borghese CM, Sachs W, Santos JC, Lu Y, O’Connell LA, Cannatella DC, Harris RA, Zakon HH. 2017. Interacting amino acid replacements allow poison frogs to evolve epibatidine resistance. *Science* **357**: 1261–1266.
- Torrie LS, Radford JC, Southall TD, Kean L, Dinsmore AJ, Davies SA, Dow JAT. 2004. Resolution of the insect ouabain paradox. *Proc Natl Acad Sci U S A* **101**: 13689–13693.
- Tufts DM, Natarajan C, Revsbech IG, Projecto-Garcia J, Hoffmann FG, Weber RE, Fago A, Moriyama H, Storz JF. 2015. Epistasis Constrains Mutational Pathways of Hemoglobin Adaptation in High-Altitude Pikas. *Mol Biol Evol* **32**: 287–298.
- Vaughan GL, Jungreis AM. 1977. Insensitivity of lepidopteran tissues to ouabain: Physiological mechanisms for protection from cardiac glycosides. *J Insect Physiol* **23**: 585–589.
- Yang. 2007. PAML 4: Phylogenetic Analysis by Maximum Likelihood. *Mol Biol Evol* **24**: 1586–1591.
- Yang L, Ravikanthachari N, Marino-Perez R, Deshmukh R, Wu M, Rosenstein A, Kunte K, Song H, Andolfatto P. 2019. Predictability in the evolution of Orthopteran cardenolide insensitivity. *bioRxiv* 542811.

Zhen Y, Aardema ML, Medina EM, Schumer M, Andolfatto P. 2012. Parallel molecular evolution in an herbivore community. *Science* **337**: 1634–1637.



## Acknowledgements:

We thank M. Przeworski and M. Schumer for comments on the manuscript, D. James and A. Wilson for sending *Syntomeida epilais* specimens and M. Aguade for providing pre-publication access to the *D. guanche* ATP $\alpha$ 1 sequence. We thank Sabrina Stiehler and Miyoung Yang for technical assistance. **Funding:** This work was funded by NIH R01 GM115523 to PA, NIH T32 GM008424 to BPR, NIH R01 GM108073 and NIH R01 AG027453 to MJP, and DFG PE 2059/3-1 to GP. **Author contributions:** PA, AMT, LY, and MJP designed the study; All authors contributed to the experimental work. PA wrote the paper. AMT, LY, AP, BPR, ADT, GP, and MJP reviewed and edited the manuscript.

## Figure Legends

**Figure 1.** Deleterious effects of substitutions at positions 111 and 122 are ameliorated by the permissive substitution A119S. **(A)** Patterns of amino acid substitution at sites implicated in CG sensitivity near the H1-H2 transmembrane domain of ATP $\alpha$ 1 in representative species from six insect orders (see **Figure S2** for all species). Dots indicate identity with the ancestral reference sequence and letters indicate derived amino acid substitutions. Positions 111 and 122, highlighted in pink and blue respectively, are hotspots of frequent parallel substitution. C104Y and N122Y represent rare substitutions associated with ATP $\alpha$ 1 duplication (Zhen et al. 2012). Position 119 (highlighted in green) had not been previously implicated in CG sensitivity, but is identified as a candidate permissive substitution in subsequent analyses. **(B)** Viability of homozygous first instar larvae, pupae and adults for the first series of engineered substitution lines. Dots indicate identity with the ancestral reference at sites C104, Q111, and N122. Adjusted Fisher's Exact Test P-values versus the wild-type strain: \*\*\* P<0.001; \*\* P<0.01, \*P<0.05. All larvae to pupa survivorship are significantly lower than wild-type (P<1e-5) except for Q111V. All larvae to adult survivorship are significantly lower than wild-type (P<1e-5). **(C)** Distributions of P-values for the strength of the phylogenetic correlation between sites 111 (above) or 122 (below) and 270 non-singleton amino acid variants in a multi-sequence alignment including 174 ATP $\alpha$ 1 sequences representing 161 species. Sites 111 and 122 exhibit highly correlated evolution. Three additional sites in the lowest 5% of P-values shared in common between sites 111 and 122, including site 119, are labelled. **(D)** Viability of homozygous first instar larvae, pupae and adults for the second series of engineered substitution lines that include A119S. Dots indicate identity with the ancestral reference at sites Q111, A119, and N122. Despite slight reductions in viability, all reductions are not significant relative to wild-type line after multiple test correction.

**Figure 2.** A119S ameliorates detrimental effects of CG-insensitivity substitutions on NKA function. Plotted are relative activity as a function of increasing concentrations of the cardiac glycoside (CG) ouabain. **(A)** Bi-phasic inhibition curves are plotted for heterozygous individuals to allow comparison of the effects of these substitutions in the presence and absence of A119S. Curves for the engineered wild-type strain (+/+) and A119S/+ are plotted for comparison. The presence of A119S alone confers only a slight (~1.5 fold) increase in CG-insensitivity. N122H alone exhibits similarly modest effects on CG-insensitivity. In contrast, N122H in combination with A119S (i.e. SH/+) results in a right-shifted curve indicating increased CG-insensitivity of the enzyme. **(B)** Inhibition curves for homozygous substitutions at positions Q111L, Q111V, Q111T and N122H in the presence of A119S reveal that these substitutions increase CG-insensitivity by 8, 20, 40 and 200-fold, respectively.

**Figure 3.** A119S ameliorates detrimental effects of CG-insensitivity substitutions on neural function. Plotted are recovery times for individuals (open circles), and means with approximate 95% confidence bounds (solid circles with whiskers), following mechanical over-stimulation (aka, the “bang sensitivity” assay). Flies heterozygous for loss-of-function ATP $\alpha$ 1 substitutions are known to have significantly longer recovery times than wild-type flies (see for e.g.  $\Delta$ 2-6b/+ relative to +/+ in panel A, P=4.5e-7). **(A)** Distributions of recovery times for heterozygous flies

(i.e. Mut/+) carrying individual substitutions A119S (S/+), Q111V (V/+) and N122H (H/+) and combinations VS/+ and SH/+. The recovery-time distributions for S/+, VS/+ and SH/+ are indistinguishable from the engineered wild-type strain (+/+). In contrast, recovery times are significantly longer than wild-type for lines with individual substitutions V/+ and H/+ ( $P=1.3e-5$  and  $P=5.2e-4$ , respectively) and are indistinguishable from the loss-of-function deletion mutation  $\Delta 2-6b/+$ . (B) Recovery times for homozygous lines S/S, VS/VS and SH/SH are all significantly longer than for heterozygotes S/+, VS/+, and SH/+ ( $P<3.3e-3$ ). These results demonstrate epistasis between substitutions at sites 119 and 111/122 at the level of neural function. A119 ameliorates the dominant dysfunction caused by Q111V and N122H but residual recessive neural dysfunction is still apparent in homozygotes that include A119S.

**Figure 4.** Adult survival upon 7-day exposure to the CG ouabain. Plotted is the log relative risk for treatments (5, 10 or 20 mM ouabain) relative to no treatment controls (no ouabain) for (A) heterozygous strains and (B) homozygous strains. Estimates (points) and 95% confidence bounds (whiskers) were obtained using the Cochran-Mantel-Haenzel framework. A value of 0 corresponds to equal probability of survival on treatment versus the no ouabain control indicating complete insensitivity to a given concentration of ouabain. Labels: + = engineered wild-type allele; S = A119S; V = Q111V; VS = Q111V+A119S; H = N122H; SH = A119S+N122H. These results reveal appreciable CG-insensitivity conferred by individual substitutions A119S (S/+ and S/S) and the recessive lethals Q111V (V/+) and N122H (H/+) compared to the engineered wild-type control strain (+/+).



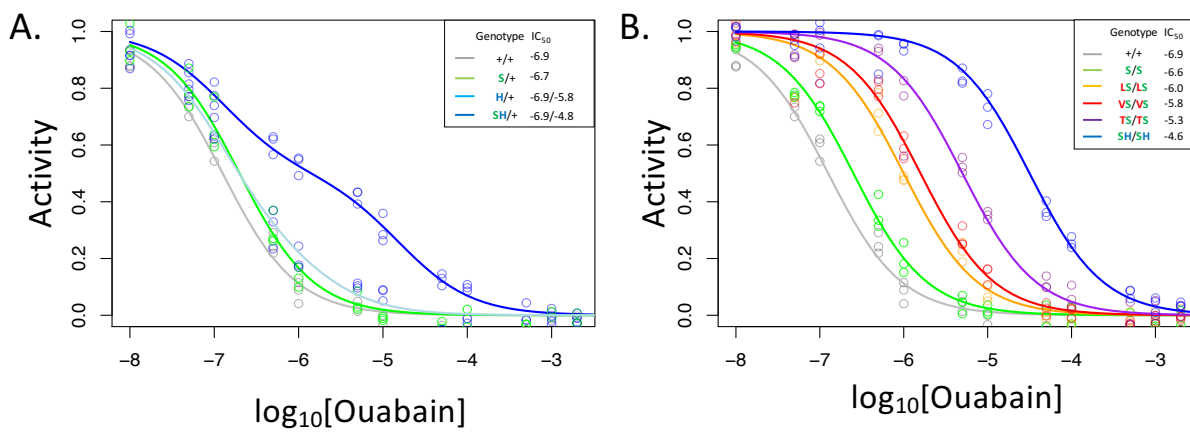

Figure 2



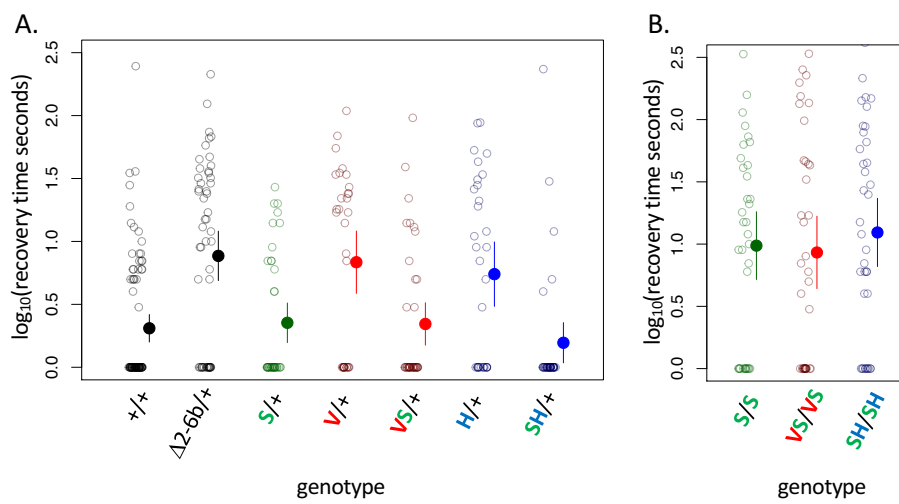

Figure 3

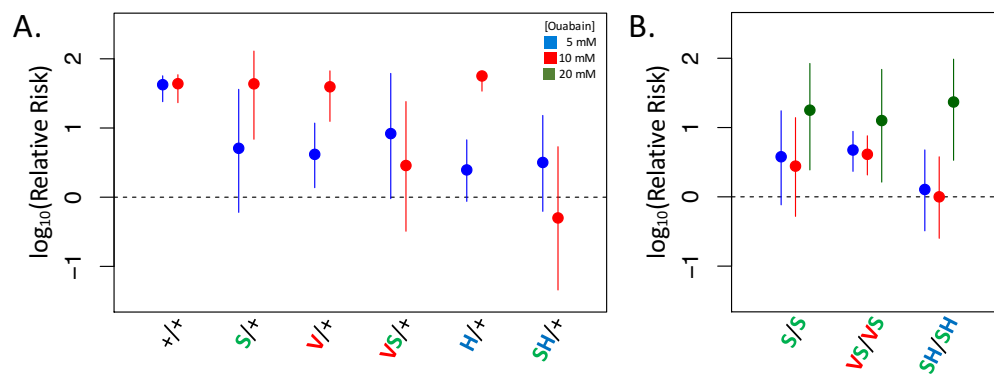

Figure 4

## Supplementary Materials

**Figure S1.** Cladogram showing relationships of sampled species.

**Figure S2.** Summary of amino acid variation at sites implicated in CG-sensitivity of ATP $\alpha$ 1 in surveyed species.

**Figure S3.** Variant sites in ATP $\alpha$ 1 most strongly correlated with substitutions with site 119.

**Figure S4.** Crystal structure of NKA bound to the cardiac glycoside ouabain (PDB:4HYT).

**Figure S5.** Enzyme inhibition curves for Q111V (V) with and without A119S (S).

**Figure S6.** Allele-specific expression (ASE) in heterozygous lines.

**Figure S7.** Bang sensitivity phenotypes of lines with heterozygous substitutions at sites 104, 111 and 122.

**Figure S8.** Bang sensitivity phenotypes of substitutions at sites 111 and 122 on the background of A119S.

**Figure S9.** Adult survival of homozygous strains with A119S upon 7-day exposure to CGs.

**Figure S10.** Engineering strategy for generating amino acid substitution lines.

**Table S1.** Sources of sequence data used in this study.

**Table S2.** References for phylogenetic relationships.

**Table S3.** Transgenic strains generated in this study.

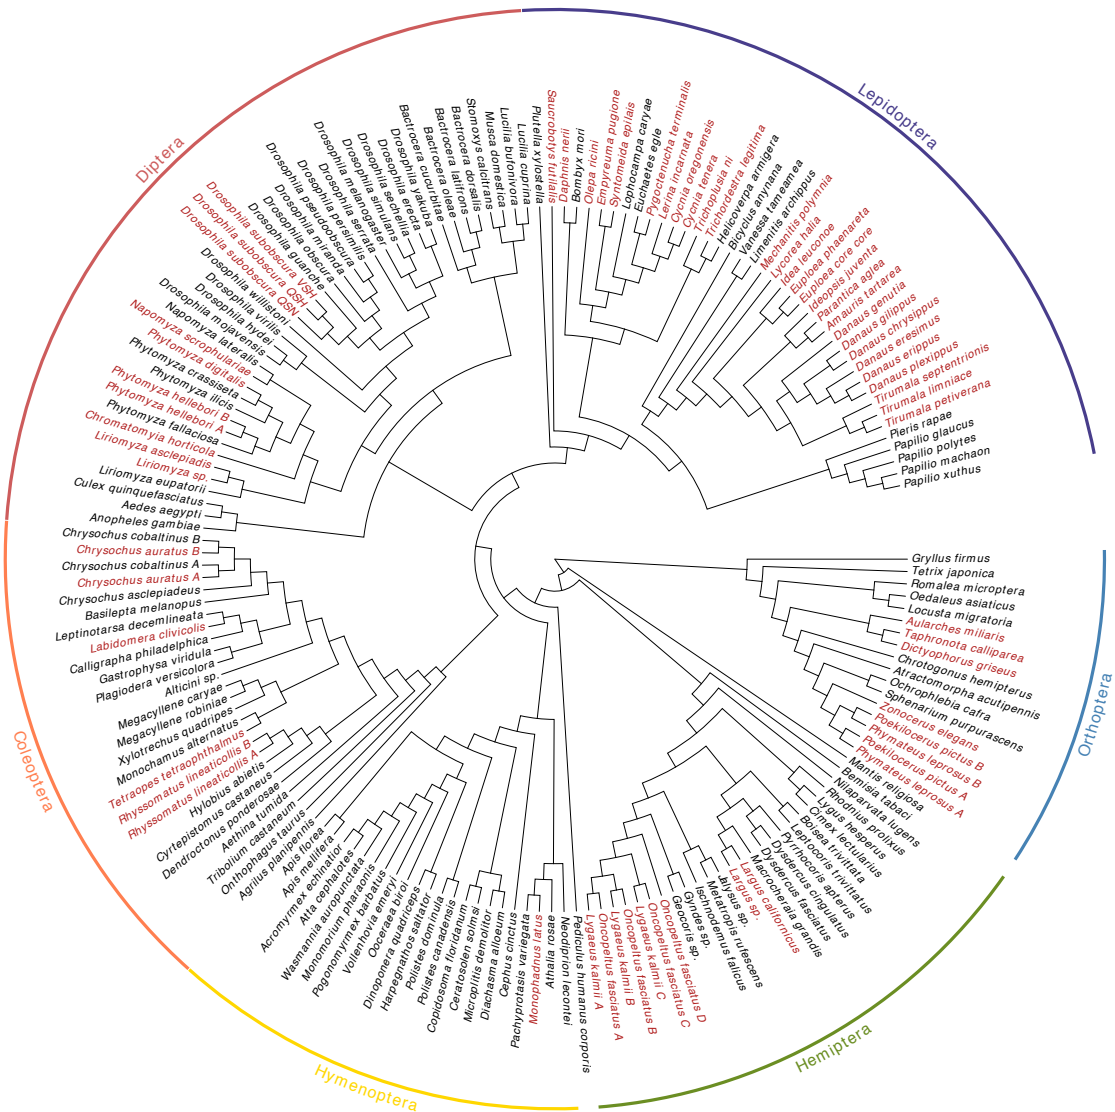

**Supplementary Figure S1.** Phylogeny showing relationships of sampled species. In red are species known specialists on CG-containing plants or inferred to be CG-insensitive.









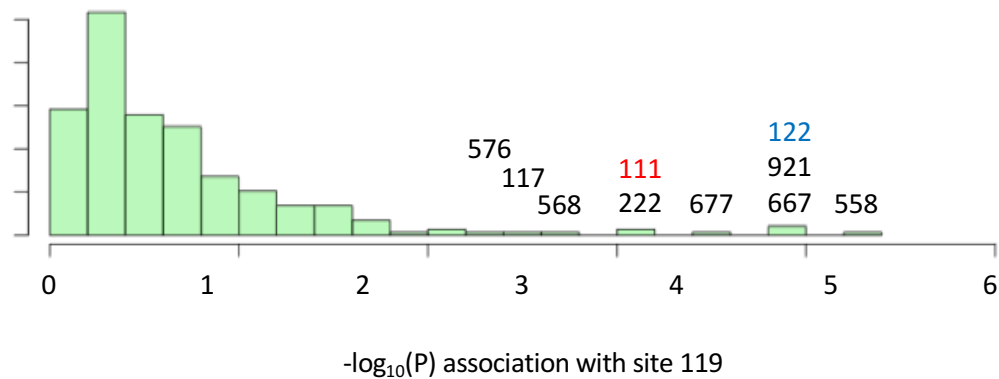

**Supplementary Figure S3.** Variant sites in ATP $\alpha$ 1 most strongly correlated with substitutions with site 119. Shown is the distribution of P-values for strength of phylogenetic correlation between site 119 and 270 non-singleton amino acid variants in an alignment including 174 ATP $\alpha$ 1 sequences representing 161 species See Methods for a description of estimating correlations using BayesTraits. Indicated are the 10 top ranking sites. Sites 111 (red) and 122 (blue) are highly-correlated interacting sites known to be important for insensitivity of the Na<sup>+</sup>,K<sup>+</sup>-ATPase to CG-inhibition (see Figure 1).

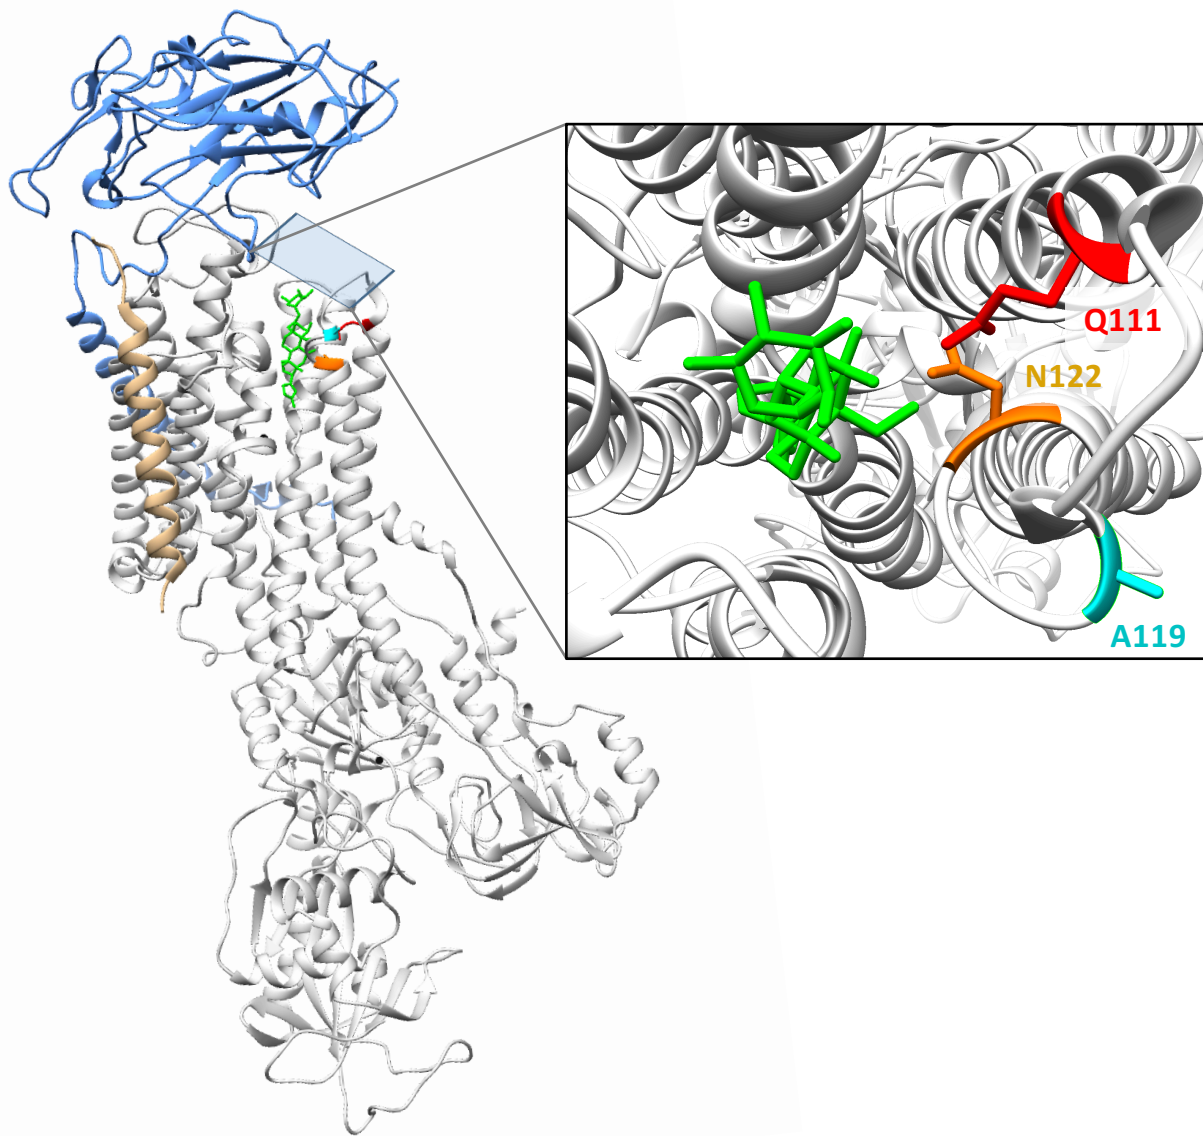

**Supplementary Figure S4.** Estimated co-crystal structure of *Drosophila melanogaster* Na<sup>+</sup>,K<sup>+</sup>-ATPase bound to the cardiac glycoside (CG) ouabain. A homology model was constructed with Swiss-Model (Waterhouse et al. 2018; <https://swissmodel.expasy.org>), using the *Sus scrofa* (pig) structure bound to ouabain (PDB:4HYT) as a template and ATP $\alpha$ 1 of *D. melanogaster* (Genbank: P13607) as target. The alpha-subunit is shown in white ribbon, and subunits beta and gamma in blue and gold ribbon, respectively. In red, magenta and orange are residues Q111, A119 and N122, respectively. The bound ouabain ligand is colored green. The structure was visualized using UCSF Chimera 1.11.2.

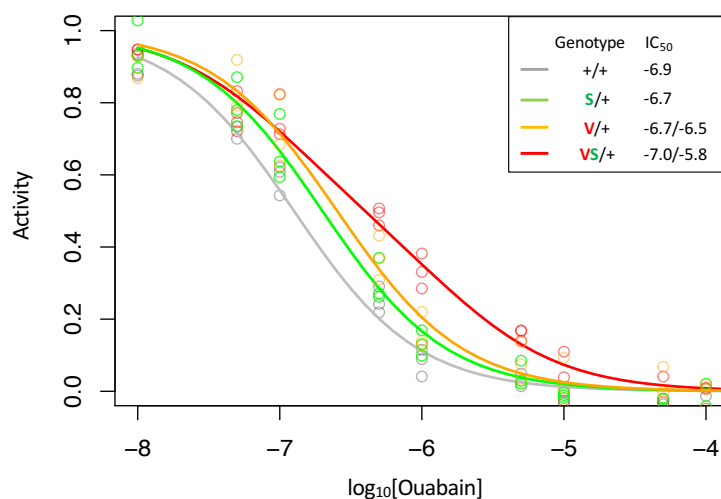

**Supplementary Figure S5.** Enzyme inhibition curves for Q111V (V) with and without A119S (S). Following Figure 3, bi-phasic inhibition curves are plotted for heterozygous individuals to allow comparison of the effects of these substitutions in the presence and absence of A119S. Curves for the engineered wild-type strain (+/+) and A119S/+ are plotted for comparison. The presence of A119S alone confers only a slight (1.5-fold) increase in CG-insensitivity. Likewise, Q111V alone has similarly modest effects on CG-insensitivity. In contrast, Q111V in combination with A119S (i.e. VS/+) results in a right-shifted curve indicating increased CG-insensitivity.

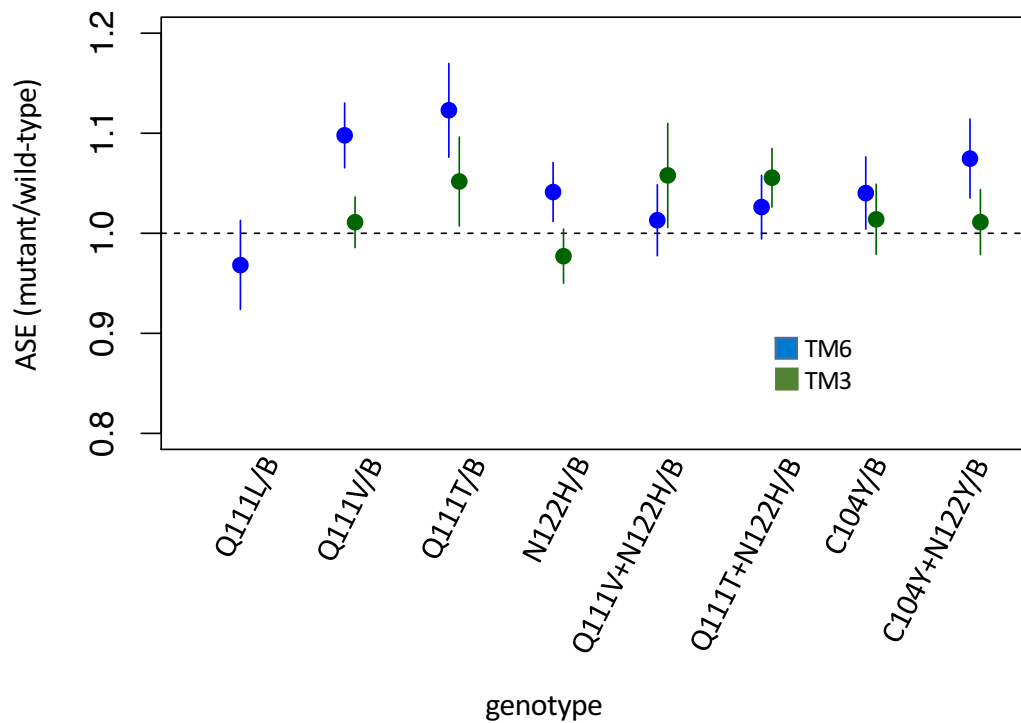

**Supplementary Figure S6.** Allele-specific expression (ASE) in heterozygous lines. Estimates and 95% confidence intervals are based on Cochran-Mantel-Haenzel framework analysis – i.e. plotted is “relative risk” of the mutant allele in the cDNA population (treatment) using genomic DNA as a control population (see Methods). Equal expression of the two alleles corresponds to a value of 1. Estimates and confidence intervals are shown for alleles balanced over two standard balancer chromosomes, B = TM6 (blue) or TM3 (green) which carries a wild-type allele of ATP $\alpha$ 1. While significant deviations from equal expression (correcting for multiple comparisons) are observed for Q111V/TM6, Q111T/TM6, C104Y+N122Y/TM6, Q111T+N122H/TM3, the magnitude of the differences are small and in favor of the mutant allele.

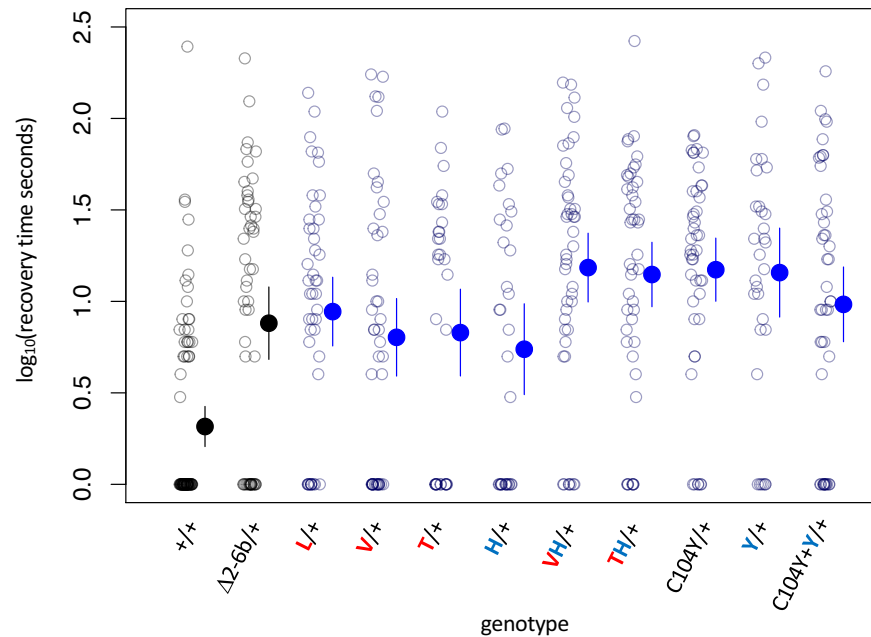

**Supplementary Figure S7.** Bang sensitivity phenotypes of lines with heterozygous substitutions at sites 104, 111 and 122.  $\Delta 2-6b$  is a loss of function deletion of ATP $\alpha 1$ . Red letters indicate substitutions at position 111; blue letters indicate substitutions at position 122. Labels: + = wild-type;  $\Delta 2-6$  = loss of function deletion of exons 2-6b; L = Q111L; V = Q111V; T = Q111T; H = N122H; Y = N122Y. All substitutions are heterozygous over the engineered wild-type allele (+). In all cases, the distributions for substitution lines (Mut/+) are significantly different than the engineered wild-type strain (+/+) ( $P < 5e-5$ , Wilcoxon test with continuity correction, correcting for multiple tests).



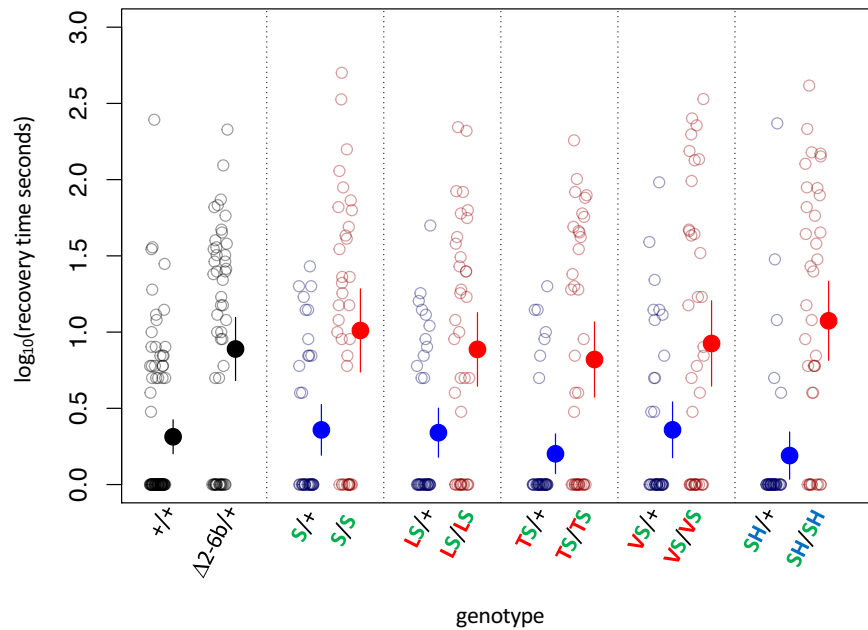

**Supplementary Figure S8.** Bang sensitivity phenotypes of substitutions at sites 111 and 122 on the background of A119S.  $\Delta 2-6b$  is a loss of function deletion of ATP $\alpha 1$ . Red letters indicate substitutions at position 111; green letters at position 119; blue letters at position 122. Blue points and whiskers indicate substitutions that are heterozygous for wild-type allele (+). Red points and whiskers indicate data for homozygous substitutions. Labels: + = engineered wild-type allele;  $\Delta 2-6$  = loss of function deletion of exons 2-6b; S = A119S; LS = Q111L+A119S; VS = Q111V+A119S; TS = Q111T+A119S; SH = A119S+N122H. In all cases, the distributions for heterozygotes (Mut/+) and homozygotes (Mut/Mut) are significantly different ( $P < 0.005$ , Wilcoxon test with continuity correction, corrected for multiple tests).

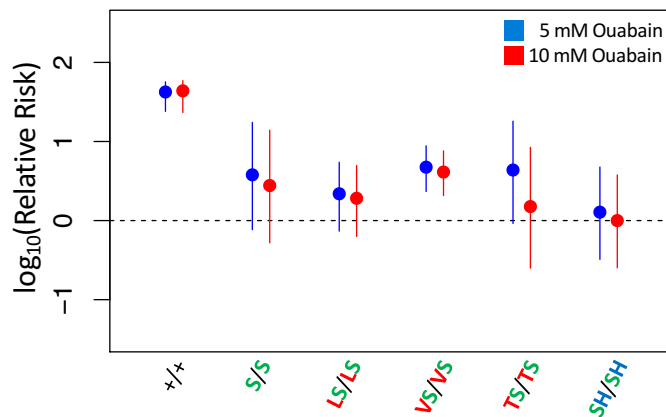

**Supplementary Figure S9.** Adult survival of homozygous strains with A119S upon 7-day exposure to CGs. Plotted is the log relative risk of treatment, for 5 mM (blue) or 10 mM (red) ouabain, relative to no treatment controls (no ouabain) for homozygous strains. Points and whiskers represent estimates and 95% confidence bounds estimated using the Cochran-Mantel-Haenzel framework (Methods). A value of 0 corresponds to equal probability of survival of treatment versus control indicating complete insensitivity to the tested ouabain concentration. Labels: +/+ = engineered wild-type strain ; S/S = A119S homozygote; LS/LS = Q111L+A119S homozygote; VS/VS = Q111V+A119S homozygote; TS/TS = Q111T+A119S homozygote; SH/SH = A119S+N122H homozygote.

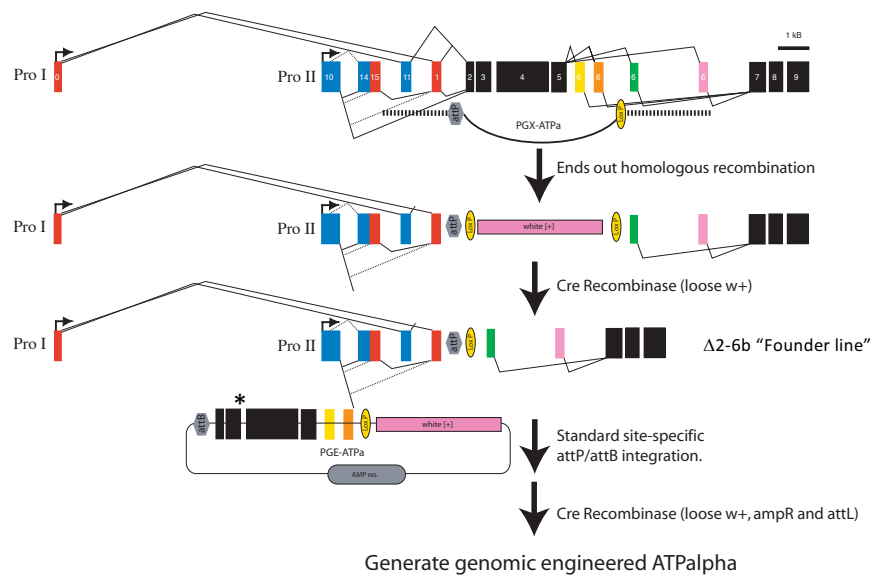

**Supplementary Figure S10.** Engineering strategy for generating amino acid substitution lines. A targeted replacement of exons 2-6b with a mini-white gene was generated by ends-out homologous recombination. The mini-white gene was removed using cre-lox site-specific recombination to create the  $\Delta$ 2-6b "Founder line". The founder line is injected with the PGE-ATPa plasmid carrying a substitution of choice (asterisk) and incorporated by site-specific phiC31/attP integration. The mini-white gene was removed using cre-lox site-specific recombination to create engineered ATP $\alpha$  (ATPalpha) lines.

## Supplementary Table S1. Sources of sequence data used in this study.

| Species                           | Order        | Method                         | Accession      | Reference or BioProject     |
|-----------------------------------|--------------|--------------------------------|----------------|-----------------------------|
| <i>Gryllus firmus</i>             | Orthoptera   | <i>RNAseq de novo</i> assembly | Pending        | Yang <i>et al.</i> 2019     |
| <i>Tetrix japonica</i>            | Orthoptera   | <i>RNAseq de novo</i> assembly | Pending        | Yang <i>et al.</i> 2019     |
| <i>Romalea microptera</i>         | Orthoptera   | <i>RNAseq de novo</i> assembly | Pending        | Yang <i>et al.</i> 2019     |
| <i>Oedaleus asiaticus</i>         | Orthoptera   | <i>RNAseq de novo</i> assembly | Pending        | Yang <i>et al.</i> 2019     |
| <i>Locusta migratoria</i>         | Orthoptera   | Sanger cDNA sequencing         | KF813097.1     | Bao, 2013                   |
| <i>Aularches miliaris</i>         | Orthoptera   | <i>RNAseq de novo</i> assembly | MK294065       | Yang <i>et al.</i> 2019     |
| <i>Taphronota calliparea</i>      | Orthoptera   | <i>RNAseq de novo</i> assembly | MK294066       | Yang <i>et al.</i> 2019     |
| <i>Dictyophorus griseus</i>       | Orthoptera   | <i>RNAseq de novo</i> assembly | MK294067       | Yang <i>et al.</i> 2019     |
| <i>Chrotogonus hemipterus</i>     | Orthoptera   | <i>RNAseq de novo</i> assembly | MK294068       | Yang <i>et al.</i> 2019     |
| <i>Atractomorpha acutipennis</i>  | Orthoptera   | <i>RNAseq de novo</i> assembly | MK294069       | Yang <i>et al.</i> 2019     |
| <i>Ochrophlebia cafra</i>         | Orthoptera   | <i>RNAseq de novo</i> assembly | MK294070       | Yang <i>et al.</i> 2019     |
| <i>Sphenarium purpurascens</i>    | Orthoptera   | <i>RNAseq de novo</i> assembly | MK294071       | Yang <i>et al.</i> 2019     |
| <i>Zonocerus elegans</i>          | Orthoptera   | <i>RNAseq de novo</i> assembly | MK294072       | Yang <i>et al.</i> 2019     |
| <i>Poecilocerus pictus B</i>      | Orthoptera   | <i>RNAseq de novo</i> assembly | MK294074       | Yang <i>et al.</i> 2019     |
| <i>Phymateus leprosus B</i>       | Orthoptera   | <i>RNAseq de novo</i> assembly | MK294073       | Yang <i>et al.</i> 2019     |
| <i>Poecilocerus pictus A</i>      | Orthoptera   | <i>RNAseq de novo</i> assembly | MK294076       | Yang <i>et al.</i> 2019     |
| <i>Phymateus leprosus A</i>       | Orthoptera   | <i>RNAseq de novo</i> assembly | MK294075       | Yang <i>et al.</i> 2019     |
| <i>Mantis religiosa</i>           | Mantodea     | <i>RNAseq de novo</i> assembly | Pending        | Yang <i>et al.</i> 2019     |
| <i>Bemisia tabaci</i>             | Hemiptera    | Query reference genome         | XM_019041063.1 | PRJNA352527                 |
| <i>Nilaparvata lugens</i>         | Hemiptera    | Query reference genome         | XM_022328639.1 | PRJNA398259                 |
| <i>Rhodnius prolixus</i>          | Hemiptera    | Query reference genome         | KQ034075.1     | PRJNA13648                  |
| <i>Lygus hesperus</i>             | Hemiptera    | <i>RNAseq de novo</i> assembly | GBRD01003681.1 | PRJNA210219                 |
| <i>Cimex lectularius</i>          | Hemiptera    | Query reference genome         | XM_014394884.2 | PRJNA298750                 |
| <i>Boisea trivittata</i>          | Hemiptera    | <i>RNAseq de novo</i> assembly | JQ771499.1     | Zhen <i>et al.</i> 2012     |
| <i>Leptocoris trivittatus</i>     | Hemiptera    | <i>RNAseq de novo</i> assembly | JQ771499.1     | Zhen <i>et al.</i> 2012     |
| <i>Pyrrhocoris apterus</i>        | Hemiptera    | PCR-sequencing cDNA            | HE956739.1     | Dobler <i>et al.</i> 2012   |
| <i>Dysdercus cingulatus</i>       | Hemiptera    | <i>RNAseq de novo</i> assembly | Pending        | SRR5040256                  |
| <i>Dysdercus fasciatus</i>        | Hemiptera    | <i>RNAseq de novo</i> assembly | Pending        | SRR489295                   |
| <i>Macrocheraia grandis</i>       | Hemiptera    | <i>RNAseq de novo</i> assembly | Pending        | SRR5040251                  |
| <i>Largus californicus</i>        | Hemiptera    | <i>RNAseq de novo</i> assembly | Pending        | SRR1821933                  |
| <i>Largus sp.</i>                 | Hemiptera    | PCR-sequencing cDNA            | HE956738.1     | Dobler <i>et al.</i> 2012   |
| <i>Jalysus sp.</i>                | Hemiptera    | <i>RNAseq de novo</i> assembly | Pending        | SRR1821926                  |
| <i>Metatropis rufescens</i>       | Hemiptera    | <i>RNAseq de novo</i> assembly | Pending        | SRR2051503                  |
| <i>Ischnodemus falicus</i>        | Hemiptera    | <i>RNAseq de novo</i> assembly | Pending        | SRR1821925                  |
| <i>Gyndes sp.</i>                 | Hemiptera    | <i>RNAseq de novo</i> assembly | Pending        | SRR5137185                  |
| <i>Geocoris sp.</i>               | Hemiptera    | <i>RNAseq de novo</i> assembly | Pending        | SRR1821921                  |
| <i>Oncopeltus fasciatus D</i>     | Hemiptera    | <i>RNAseq de novo</i> assembly | MK765670       | Yang <i>et al.</i> 2019     |
| <i>Oncopeltus fasciatus C</i>     | Hemiptera    | <i>RNAseq de novo</i> assembly | JQ771518.1     | Zhen <i>et al.</i> 2012     |
| <i>Lygaeus kalmii C</i>           | Hemiptera    | <i>RNAseq de novo</i> assembly | JQ771515.1     | Zhen <i>et al.</i> 2012     |
| <i>Oncopeltus fasciatus B</i>     | Hemiptera    | <i>RNAseq de novo</i> assembly | JQ771519.1     | Zhen <i>et al.</i> 2012     |
| <i>Lygaeus kalmii B</i>           | Hemiptera    | <i>RNAseq de novo</i> assembly | JQ771514.1     | Zhen <i>et al.</i> 2012     |
| <i>Oncopeltus fasciatus A</i>     | Hemiptera    | <i>RNAseq de novo</i> assembly | JQ771520.1     | Zhen <i>et al.</i> 2012     |
| <i>Lygaeus kalmii A</i>           | Hemiptera    | <i>RNAseq de novo</i> assembly | JQ771513.1     | Zhen <i>et al.</i> 2012     |
| <i>Pediculus humanus corporis</i> | Phthiraptera | Query reference genome         | XM_002427669.1 | Kirkness <i>et al.</i> 2007 |
| <i>Neodiprion lecontei</i>        | Hymenoptera  | Query reference genome         | XM_015658649.1 | PRJNA312506                 |
| <i>Athalia rosae</i>              | Hymenoptera  | Query reference genome         | XM_012414228.2 | PRJNA282653                 |
| <i>Monophadnus latus</i>          | Hymenoptera  | <i>RNAseq de novo</i> assembly | Pending        | This study                  |
| <i>Pachyprotasis variegata</i>    | Hymenoptera  | PCR-sequencing cDNA            | LN736263.1     | Dobler <i>et al.</i> 2015   |
| <i>Cephus cinctus</i>             | Hymenoptera  | Query reference genome         | XM_015729628.2 | PRJNA297591                 |
| <i>Diachasma alloenum</i>         | Hymenoptera  | Query reference genome         | XM_015265214.1 | PRJNA306876                 |
| <i>Microplitis demolitor</i>      | Hymenoptera  | Query reference genome         | XM_008550885.1 | PRJNA251518                 |
| <i>Ceratostenes solmsi</i>        | Hymenoptera  | Query reference genome         | XM_011505654.1 | PRJNA277475                 |
| <i>Copidosoma floridanum</i>      | Hymenoptera  | Query reference genome         | XM_014350407.2 | PRJNA297581                 |
| <i>Polistes canadensis</i>        | Hymenoptera  | Query reference genome         | XM_014749330.1 | PRJNA301748                 |
| <i>Polistes dominula</i>          | Hymenoptera  | Query reference genome         | XM_015323700.1 | PRJNA307991                 |
| <i>Harpegnathos saltator</i>      | Hymenoptera  | Query reference genome         | XM_025304334.1 | PRJNA476946                 |
| <i>Dinoponera quadriceps</i>      | Hymenoptera  | Query reference genome         | XM_014620740.1 | PRJNA301625                 |
| <i>Ooceraea biroi</i>             | Hymenoptera  | Query reference genome         | XM_011345351.3 | PRJNA501908                 |
| <i>Vollenhovia emeryi</i>         | Hymenoptera  | Query reference genome         | XM_012020948.1 | PRJNA278668                 |
| <i>Pogonomyrmex barbatus</i>      | Hymenoptera  | Query reference genome         | XM_011645049.2 | PRJNA276107                 |
| <i>Monomorium pharaonis</i>       | Hymenoptera  | Query reference genome         | XM_012678519.2 | PRJNA479782                 |
| <i>Wasmannia auropunctata</i>     | Hymenoptera  | Query reference genome         | XM_011708535.1 | PRJNA279179                 |

|                                    |             |                                |                |                                           |
|------------------------------------|-------------|--------------------------------|----------------|-------------------------------------------|
| <i>Atta cephalotes</i>             | Hymenoptera | Query reference genome         | XM_012202049.1 | PRJNA279976                               |
| <i>Acromyrmex echinator</i>        | Hymenoptera | Query reference genome         | XM_011052414.1 | PRJNA271903                               |
| <i>Apis mellifera</i>              | Hymenoptera | Query reference genome         | XM_020018205.1 | PRJNA361278                               |
| <i>Apis florea</i>                 | Hymenoptera | Query reference genome         | XM_012490248.1 | PRJNA86991                                |
| <i>Agrilus planipennis</i>         | Coleoptera  | Query reference genome         | XM_018472182.2 | PRJNA343475                               |
| <i>Onthophagus taurus</i>          | Coleoptera  | Query reference genome         | XM_023047807.1 | PRJNA419349                               |
| <i>Tribolium castaneum</i>         | Coleoptera  | Query reference genome         | XM_008198195.2 | PRJNA15718                                |
| <i>Aethina tumida</i>              | Coleoptera  | Query reference genome         | XM_020018205.1 | PRJNA361278                               |
| <i>Dendroctonus ponderosae</i>     | Coleoptera  | Query reference genome         | XM_019913697.1 | PRJNA360270                               |
| <i>Cyrtepidomus castaneus</i>      | Coleoptera  | <i>RNAseq de novo</i> assembly | JQ771502.1     | Zhen <i>et al.</i> 2012                   |
| <i>Hyllobius abietis</i>           | Coleoptera  | <i>RNAseq de novo</i> assembly | Pending        | SRR6765939                                |
| <i>Rhyssomatus lineaticollis A</i> | Coleoptera  | <i>RNAseq de novo</i> assembly | JQ771524.1     | Zhen <i>et al.</i> 2012                   |
| <i>Rhyssomatus lineaticollis B</i> | Coleoptera  | <i>RNAseq de novo</i> assembly | JQ771523.1     | Zhen <i>et al.</i> 2012                   |
| <i>Tetraopes tetraophthalmus</i>   | Coleoptera  | <i>RNAseq de novo</i> assembly | JQ771526.1     | Zhen <i>et al.</i> 2012                   |
| <i>Monochamus alternatus</i>       | Coleoptera  | <i>RNAseq de novo</i> assembly | Pending        | SRR2521326                                |
| <i>Xylotrechus quadripes</i>       | Coleoptera  | <i>RNAseq de novo</i> assembly | Pending        | SRR7077078                                |
| <i>Megacyllene robiniae</i>        | Coleoptera  | <i>RNAseq de novo</i> assembly | JQ771517.1     | Zhen <i>et al.</i> 2012                   |
| <i>Megacyllene caryae</i>          | Coleoptera  | <i>RNAseq de novo</i> assembly | Pending        | SRR1586007                                |
| <i>Alticini sp.</i>                | Coleoptera  | PCR-sequencing cDNA            | HE956742.1     | Dobler <i>et al.</i> 2012                 |
| <i>Plagiodera versicolora</i>      | Coleoptera  | <i>RNAseq de novo</i> assembly | JQ771522.1     | Zhen <i>et al.</i> 2012                   |
| <i>Gastrophysa viridula</i>        | Coleoptera  | PCR-sequencing cDNA            | HE956744.1     | Dobler <i>et al.</i> 2012                 |
| <i>Calligrapha philadelphia</i>    | Coleoptera  | <i>RNAseq de novo</i> assembly | Pending        | ERR1333730                                |
| <i>Labidomera clivicollis</i>      | Coleoptera  | <i>RNAseq de novo</i> assembly | JQ771511.1     | Zhen <i>et al.</i> 2012                   |
| <i>Leptinotarsa decemlineata</i>   | Coleoptera  | Query reference genome         | XM_023161024.1 | PRJNA420356                               |
| <i>Basilepta melanopus</i>         | Coleoptera  | <i>RNAseq de novo</i> assembly | Pending        | SRR8187395                                |
| <i>Chrysochus asclepiadeus</i>     | Coleoptera  | PCR-sequencing cDNA            | HE956740.1     | Dobler <i>et al.</i> 2012                 |
| <i>Chrysochus auratus A</i>        | Coleoptera  | <i>RNAseq de novo</i> assembly | JQ771500.1     | Zhen <i>et al.</i> 2012                   |
| <i>Chrysochus cobalitinus A</i>    | Coleoptera  | <i>RNAseq de novo</i> assembly | MK765671       | Yang <i>et al.</i> 2019                   |
| <i>Chrysochus auratus B</i>        | Coleoptera  | <i>RNAseq de novo</i> assembly | JQ771501.1     | Zhen <i>et al.</i> 2012                   |
| <i>Chrysochus cobalitinus B</i>    | Coleoptera  | <i>RNAseq de novo</i> assembly | MK765672       | Yang <i>et al.</i> 2019                   |
| <i>Culex quinquefasciatus</i>      | Diptera     | Query reference genome         | NW_001886804.1 | PRJNA29017                                |
| <i>Aedes aegypti</i>               | Diptera     | Query reference genome         | NC_035107.1    | PRJNA318737                               |
| <i>Anopheles gambiae</i>           | Diptera     | Query reference genome         | XM_020076988.1 | PRJNA357111                               |
| <i>Liriomyza eupatorii</i>         | Diptera     | PCR-sequencing cDNA            | LT795109.1     | Petschenka <i>et al.</i> 2017             |
| <i>Liriomyza sp.</i>               | Diptera     | PCR-sequencing cDNA            | HE956748.1     | Dobler <i>et al.</i> 2012                 |
| <i>Liriomyza asclepiadis</i>       | Diptera     | <i>RNAseq de novo</i> assembly | MK294077       | Yang <i>et al.</i> 2019                   |
| <i>Chromatomyia horticola</i>      | Diptera     | PCR-sequencing cDNA            | LT795081.1     | Petschenka <i>et al.</i> 2017             |
| <i>Phytomyza fallaciosa</i>        | Diptera     | PCR-sequencing cDNA            | LT795082.1     | Petschenka <i>et al.</i> 2017             |
| <i>Phytomyza hellebori A</i>       | Diptera     | PCR-sequencing cDNA            | LT795110.1     | Petschenka <i>et al.</i> 2017             |
| <i>Phytomyza hellebori B</i>       | Diptera     | PCR-sequencing cDNA            | LT795111.1     | Petschenka <i>et al.</i> 2017             |
| <i>Phytomyza crassiseti</i>        | Diptera     | PCR-sequencing cDNA            | LT795078.1     | Petschenka <i>et al.</i> 2017             |
| <i>Phytomyza ilicis</i>            | Diptera     | PCR-sequencing cDNA            | LT795077.1     | Petschenka <i>et al.</i> 2017             |
| <i>Phytomyza digitalis</i>         | Diptera     | PCR-sequencing cDNA            | LT795083.1     | Petschenka <i>et al.</i> 2017             |
| <i>Napomyza scrophulariae</i>      | Diptera     | PCR-sequencing cDNA            | LT795080.1     | Petschenka <i>et al.</i> 2017             |
| <i>Napomyza lateralis</i>          | Diptera     | PCR-sequencing cDNA            | LT795079.1     | Petschenka <i>et al.</i> 2017             |
| <i>Drosophila mojavensis</i>       | Diptera     | Query reference genome         | XM_015167953.1 | PRJNA29977                                |
| <i>Drosophila hydei</i>            | Diptera     | Query reference genome         | XM_023321093.1 | PRJNA422293                               |
| <i>Drosophila virilis</i>          | Diptera     | Query reference genome         | XM_002055964.2 | PRJNA29995                                |
| <i>Drosophila willistoni</i>       | Diptera     | Query reference genome         | XM_015177397.2 | PRJNA29997                                |
| <i>Drosophila subobscura</i> QSN   | Diptera     | <i>RNAseq de novo</i> assembly | Pending        | This study                                |
| <i>Drosophila subobscura</i> QSH   | Diptera     | PCR-sequencing gDNA            | KT318950.1     | Pegueroles <i>et al.</i> 2016             |
| <i>Drosophila subobscura</i> VSH   | Diptera     | PCR-sequencing cDNA            | KT318946.1     | Pegueroles <i>et al.</i> 2016             |
| <i>Drosophila guanche</i>          | Diptera     | Query reference genome         | Pending        | Puerma <i>et al.</i> 2018                 |
| <i>Drosophila obscura</i>          | Diptera     | Query reference genome         | XM_022353228.1 | PRJNA399719                               |
| <i>Drosophila miranda</i>          | Diptera     | Query reference genome         | XM_017286564.1 | PRJNA325520                               |
| <i>Drosophila pseudoobscura</i>    | Diptera     | Query reference genome         | XM_001358575.3 | Drosophila 12 Genomes Consortium, 2007    |
| <i>Drosophila persimilis</i>       | Diptera     | Query reference genome         | XM_026985943.1 | PRJNA501994                               |
| <i>Drosophila serrata</i>          | Diptera     | Query reference genome         | XM_020943893.1 | PRJNA384652                               |
| <i>Drosophila melanogaster</i>     | Diptera     | Query reference genome         | FBgn0002921    | ftp://ftp.flybase.net/releases/FB2019_01/ |
| <i>Drosophila simulans</i>         | Diptera     | Query reference genome         | XM_002102615.2 | PRJNA297806                               |
| <i>Drosophila sechellia</i>        | Diptera     | Query reference genome         | XM_002044256.1 | Drosophila 12 Genomes Consortium, 2007    |
| <i>Drosophila erecta</i>           | Diptera     | Query reference genome         | XM_001979324.3 | PRJNA501994                               |

|                                |             |                                |                |                                |
|--------------------------------|-------------|--------------------------------|----------------|--------------------------------|
| <i>Drosophila yakuba</i>       | Diptera     | Query reference genome         | XM_015191921.1 | PRJNA29999                     |
| <i>Bactrocera cucurbitae</i>   | Diptera     | Query reference genome         | XM_011190816.1 | PRJNA273817                    |
| <i>Bactrocera oleae</i>        | Diptera     | Query reference genome         | XM_014232491.1 | PRJNA293367                    |
| <i>Bactrocera latifrons</i>    | Diptera     | Query reference genome         | XM_018929031.1 | PRJNA351211                    |
| <i>Bactrocera dorsalis</i>     | Diptera     | Query reference genome         | XM_011214825.2 | PRJNA273958                    |
| <i>Stomoxys calcitrans</i>     | Diptera     | Query reference genome         | XM_013260537.1 | PRJNA288986                    |
| <i>Musca domestica</i>         | Diptera     | Query reference genome         | XM_020037539.1 | PRJNA210139                    |
| <i>Lucilia bufonivora</i>      | Diptera     | PCR-sequencing cDNA            | HG938131.1     | Mebs <i>et al.</i> 2014        |
| <i>Lucilia cuprina</i>         | Diptera     | Query reference genome         | XM_023439570.1 | PRJNA423280                    |
| <i>Plutella xylostella</i>     | Lepidoptera | Query reference genome         | XM_011549930.1 | PRJNA277936                    |
| <i>Saucrobotys futilalis</i>   | Lepidoptera | PCR-sequencing cDNA            | HE956749.1     | Dobler <i>et al.</i> 2012      |
| <i>Daphnis nerii</i>           | Lepidoptera | <i>RNAseq de novo</i> assembly | MK294081       | Yang <i>et al.</i> 2019        |
| <i>Bombyx mori</i>             | Lepidoptera | cDNA sequencing                | LC029030.1     | Homareda and Hara, unpublished |
| <i>Empyreuma pugione</i>       | Lepidoptera | PCR-sequencing cDNA            | LN736266.1     | Dobler <i>et al.</i> 2015      |
| <i>Olepa ricini</i>            | Lepidoptera | <i>RNAseq de novo</i> assembly | MK294080       | Yang <i>et al.</i> 2019        |
| <i>Lerina incarnata</i>        | Lepidoptera | PCR-sequencing cDNA            | HE956754.1     | Dobler <i>et al.</i> 2012      |
| <i>Pygoctenucha terminalis</i> | Lepidoptera | PCR-sequencing cDNA            | HE956753.1     | Dobler <i>et al.</i> 2012      |
| <i>Syntomeida epilais</i>      | Lepidoptera | <i>RNAseq de novo</i> assembly | Pending        | This study                     |
| <i>Lophocampa caryae</i>       | Lepidoptera | <i>RNAseq de novo</i> assembly | JQ771510.1     | Zhen <i>et al.</i> 2012        |
| <i>Euchaetes egle</i>          | Lepidoptera | <i>RNAseq de novo</i> assembly | JQ771508.1     | Zhen <i>et al.</i> 2012        |
| <i>Cygnia oregonensis</i>      | Lepidoptera | PCR-sequencing cDNA            | HE956750.1     | Dobler <i>et al.</i> 2012      |
| <i>Cygnia tenera</i>           | Lepidoptera | <i>RNAseq de novo</i> assembly | JQ771504.1     | Zhen <i>et al.</i> 2012        |
| <i>Trichoplusia ni</i>         | Lepidoptera | Query reference genome         | XM_026879049.1 | PRJNA497582                    |
| <i>Trichordestra legitima</i>  | Lepidoptera | <i>RNAseq de novo</i> assembly | JQ771525.1     | Zhen <i>et al.</i> 2012        |
| <i>Helicoverpa armigera</i>    | Lepidoptera | Query reference genome         | XM_021340407.1 | PRJNA388211                    |
| <i>Bicyclus anynana</i>        | Lepidoptera | Query reference genome         | XM_024099163.1 | PRJNA434100                    |
| <i>Vanessa tameamea</i>        | Lepidoptera | Query reference genome         | XM_026633901.1 | PRJNA493654                    |
| <i>Limenitis archippus</i>     | Lepidoptera | <i>RNAseq de novo</i> assembly | JQ771509.1     | Zhen <i>et al.</i> 2012        |
| <i>Mechanitis polymnia</i>     | Lepidoptera | PCR-sequencing cDNA            | HF945460.1     | Petschenka <i>et al.</i> 2013  |
| <i>Lycorea halia</i>           | Lepidoptera | <i>RNAseq de novo</i> assembly | JQ771512.1     | Zhen <i>et al.</i> 2012        |
| <i>Idea leuconoe</i>           | Lepidoptera | PCR-sequencing cDNA            | HF945457.1     | Petschenka <i>et al.</i> 2013  |
| <i>Euploea phaenareta</i>      | Lepidoptera | PCR-sequencing cDNA            | HF945456.1     | Petschenka <i>et al.</i> 2013  |
| <i>Euploea core core</i>       | Lepidoptera | <i>RNAseq de novo</i> assembly | MK294079       | Yang <i>et al.</i> 2019        |
| <i>Ideopsis juvena</i>         | Lepidoptera | PCR-sequencing cDNA            | HF945458.1     | Petschenka <i>et al.</i> 2013  |
| <i>Parantica aglea</i>         | Lepidoptera | PCR-sequencing cDNA            | HF945461.1     | Petschenka <i>et al.</i> 2013  |
| <i>Amauris tartarea</i>        | Lepidoptera | PCR-sequencing cDNA            | HF945450.1     | Petschenka <i>et al.</i> 2013  |
| <i>Danaus genuttia</i>         | Lepidoptera | PCR-sequencing cDNA            | HF945453.1     | Petschenka <i>et al.</i> 2013  |
| <i>Danaus gilippus</i>         | Lepidoptera | <i>RNAseq de novo</i> assembly | JQ771506.1     | Zhen <i>et al.</i> 2012        |
| <i>Danaus chrysippus</i>       | Lepidoptera | <i>RNAseq de novo</i> assembly | MK294078       | Yang <i>et al.</i> 2019        |
| <i>Danaus eresimus</i>         | Lepidoptera | <i>RNAseq de novo</i> assembly | JQ771505.1     | Zhen <i>et al.</i> 2012        |
| <i>Danaus erippus</i>          | Lepidoptera | PCR-sequencing cDNA            | HF945451.1     | Petschenka <i>et al.</i> 2013  |
| <i>Danaus plexippus</i>        | Lepidoptera | <i>RNAseq de novo</i> assembly | JQ771507.1     | Zhen <i>et al.</i> 2012        |
| <i>Tirumala septentrionis</i>  | Lepidoptera | PCR-sequencing cDNA            | HF945464.1     | Petschenka <i>et al.</i> 2013  |
| <i>Tirumala limniace</i>       | Lepidoptera | PCR-sequencing cDNA            | HF945462.1     | Petschenka <i>et al.</i> 2013  |
| <i>Tirumala petiverana</i>     | Lepidoptera | PCR-sequencing cDNA            | HF945463.1     | Petschenka <i>et al.</i> 2013  |
| <i>Pieris rapae</i>            | Lepidoptera | Query reference genome         | XM_022259192.1 | PRJNA397594                    |
| <i>Papilio glaucus</i>         | Lepidoptera | <i>RNAseq de novo</i> assembly | JQ771498.1     | Zhen <i>et al.</i> 2012        |
| <i>Papilio polytes</i>         | Lepidoptera | Query reference genome         | XM_013283743.1 | PRJNA291535                    |
| <i>Papilio machaon</i>         | Lepidoptera | Query reference genome         | XM_014516575.1 | PRJNA300299                    |
| <i>Papilio xuthus</i>          | Lepidoptera | Query reference genome         | XM_013315255.1 | PRJNA291600                    |



**Supplementary Table S2.** References for the phylogenetic relationships of taxa used in this study.

| Group       | References |
|-------------|------------|
| Insecta     | 1          |
| Orthoptera  | 2–4        |
| Hymenoptera | 5–8        |
| Hemiptera   | 9–12       |
| Coleoptera  | 13,14      |
| Diptera     | 15–20      |
| Lepidoptera | 21–26      |

**References**

1. Misof, B. *et al.* Phylogenomics resolves the timing and pattern of insect evolution. *Science* **346**, 763–767 (2014).
2. Song, H. *et al.* 300 million years of diversification: elucidating the patterns of orthopteran evolution based on comprehensive taxon and gene sampling. *Cladistics* **31**, 621–651 (2015).
3. Song, H., Foquet, B., Mariño-Pérez, R. & Woller, D. A. Phylogeny of locusts and grasshoppers reveals complex evolution of density-dependent phenotypic plasticity. *Sci Rep* **7**, 6606 (2017).
4. Yang, L. *et al.* Predictability in the evolution of Orthopteran cardenolide insensitivity. *bioRxiv* 542811 (2019). doi:10.1101/542811
5. Song, S.-N., Tang, P., Wei, S.-J. & Chen, X.-X. Comparative and phylogenetic analysis of the mitochondrial genomes in basal hymenopterans. *Sci Rep* **6**, 20972 (2016).
6. Boevé, J.-L., Blank, S. M., Meijer, G. & Nyman, T. Invertebrate and avian predators as drivers of chemical defensive strategies in tenthredinid sawflies. *BMC Evol. Biol.* **13**, 198 (2013).
7. Ward, P. S., Brady, S. G., Fisher, B. L. & Schultz, T. R. The evolution of myrmicine ants: phylogeny and biogeography of a hyperdiverse ant clade (Hymenoptera: Formicidae). *Systematic Entomology* **40**, 61–81 (2015).
8. Ward, P. S. The Phylogeny and Evolution of Ants. *Annual Review of Ecology, Evolution, and Systematics* **45**, 23–43 (2014).
9. Yuan, M.-L., Zhang, Q.-L., Guo, Z.-L., Wang, J. & Shen, Y.-Y. Comparative mitogenomic analysis of the superfamily Pentatomoidea (Insecta: Hemiptera: Heteroptera) and phylogenetic implications. *BMC Genomics* **16**, 460 (2015).
10. Li, H. *et al.* Mitochondrial phylogenomics of Hemiptera reveals adaptive innovations driving the diversification of true bugs. *Proc. Biol. Sci.* **284**, (2017).
11. Kikuchi, Y., Hosokawa, T. & Fukatsu, T. An ancient but promiscuous host-symbiont association between Burkholderia gut symbionts and their heteropteran hosts. *ISME J* **5**, 446–460 (2011).
12. Cryan, J. R. & Urban, J. M. Higher-level phylogeny of the insect order Hemiptera: is Auchenorrhyncha really paraphyletic? *Systematic Entomology* **37**, 7–21 (2012).
13. Zhang, S.-Q. *et al.* Evolutionary history of Coleoptera revealed by extensive sampling of genes and species. *Nat Commun* **9**, 205 (2018).
14. Shin, S. *et al.* Phylogenomic Data Yield New and Robust Insights into the Phylogeny and Evolution of Weevils. *Mol. Biol. Evol.* **35**, 823–836 (2018).
15. Junqueira, A. C. M. *et al.* Large-scale mitogenomics enables insights into Schizophora (Diptera) radiation and population diversity. *Sci Rep* **6**, 21762 (2016).

16. Wiegmann, B. M. *et al.* Episodic radiations in the fly tree of life. *Proc. Natl. Acad. Sci. U.S.A.* **108**, 5690–5695 (2011).
17. O’Grady, P. M. & DeSalle, R. Phylogeny of the Genus *Drosophila*. *Genetics* **209**, 1–25 (2018).
18. Gao, J., Watabe, H., Aotsuka, T., Pang, J. & Zhang, Y. Molecular phylogeny of the *Drosophila* obscura species group, with emphasis on the Old World species. *BMC Evol. Biol.* **7**, 87 (2007).
19. Williams, K. A., Lamb, J. & Villet, M. H. Phylogenetic radiation of the greenbottle flies (Diptera, Calliphoridae, Luciliinae). *Zookeys* 59–86 (2016). doi:10.3897/zookeys.568.6696
20. Arias-Robledo, G., Stark, T., Wall, R. L. & Stevens, J. R. The toad fly *Lucilia bufonivora*: its evolutionary status and molecular identification. *Med. Vet. Entomol.* **33**, 131–139 (2019).
21. Zahiri, R. *et al.* A new molecular phylogeny offers hope for a stable family level classification of the Noctuoidea (Lepidoptera). *Zoologica Scripta* **40**, 158–173 (2011).
22. Zahiri, R. *et al.* Molecular phylogenetics of Erebidae (Lepidoptera, Noctuoidea). *Systematic Entomology* **37**, 102–124 (2012).
23. DaCosta, M. A., Larson, P., Donahue, J. P. & Weller, S. J. Phylogeny of Milkweed Tussocks (Arctiidae: Arctiinae: Phaegopterini) and Its Implications for Evolution of Ultrasound Communication. *esaa* **99**, 723–742 (2006).
24. Zenker, M. M. *et al.* Systematics and origin of moths in the subfamily Arctiinae (Lepidoptera, Erebidae) in the Neotropical region. *Zoologica Scripta* **46**, 348–362 (2017).
25. Aardema, M. L. & Andolfatto, P. Phylogenetic incongruence and the evolutionary origins of cardenolide-resistant forms of Na(+),K(+)-ATPase in *Danaus* butterflies. *Evolution* **70**, 1913–1921 (2016).
26. Petschenka, G. *et al.* Stepwise evolution of resistance to toxic cardenolides via genetic substitutions in the Na+/K+ -ATPase of milkweed butterflies (Lepidoptera: Danaini). *Evolution* **67**, 2753–2761 (2013).

**Supplementary Table S3.** Transgenic strains generated in this study.

| Line | Substitution(s) | Genotype                            | M/M viable? | Bang Sensitivity |     | Ouabain Sensitivity (Adult Exposure) |     |
|------|-----------------|-------------------------------------|-------------|------------------|-----|--------------------------------------|-----|
|      |                 |                                     |             | M/+              | M/M | M/+                                  | M/M |
| 0    | Δ2-6            | w <sup>118</sup> ;Δ2-6/TM6          | no          | yes              | .   | .                                    | .   |
| 1    | None            | w <sup>118</sup> ;GE-WT             | yes         | .                | ref | .                                    | ref |
| 20   | N122H           | w <sup>118</sup> ;N122H/TM6         | no          | yes              | .   | +++                                  | .   |
| 21   | Q111L           | w <sup>118</sup> ;Q111L/TM6         | no          | yes              | .   | +++                                  | .   |
| 22   | Q111T           | w <sup>118</sup> ;Q111T/TM6         | no          | yes              | .   | .                                    | .   |
| 23   | Q111V           | w <sup>118</sup> ;Q111V/TM6         | no          | yes              | .   | +++                                  | .   |
| 24   | C104Y           | w <sup>118</sup> ;C104Y/TM6         | no          | yes              | .   | .                                    | .   |
| 25   | Q111T,N122H     | w <sup>118</sup> ;Q111T, N122H/TM6  | no          | yes              | .   | .                                    | .   |
| 26   | Q111V,N122H     | w <sup>118</sup> ; Q111V, N122H/TM6 | no          | yes              | .   | .                                    | .   |
| 27   | C104Y,N122Y     | w <sup>118</sup> ;C104Y,N122Y/TM6   | no          | yes              | .   | .                                    | .   |
| 28   | N122Y           | w <sup>118</sup> ;N122Y/TM6         | no          | yes              | .   | .                                    | .   |
| 31   | A119S           | w <sup>118</sup> ;A119S             | yes         | no               | yes | ++                                   | +   |
| 32   | Q111L,A119S     | w <sup>118</sup> ;Q111L,A119S       | yes         | no               | yes | .                                    | +   |
| 33   | Q111V,A119S     | w <sup>118</sup> ;Q111V,A119S       | yes         | no               | yes | +                                    | ++  |
| 34   | A119S,N122H     | w <sup>118</sup> ;A119S,N122H       | yes         | no               | yes | +                                    | +   |
| 35   | Q111T,A119S     | w <sup>118</sup> ; Q111T,A119S      | yes         | no               | yes | .                                    | +   |

NOTE – “TM6” = *TM6B, P{w[+mC]=Dfd-EYFP}3, Sb<sup>1</sup>,Tb<sup>1</sup>,ca<sup>1</sup>*. Δ2-6 is a loss-of-function deletion. M/+ and M/M refer to heterozygous and homozygous substitutions, respectively. Mut/+ were assayed such that the + allele is derived from line 1 (the engineered wild-type strain). “ref” refers to the reference strain used for the assay. “.” indicates genotypes that were not assayed. Sensitivity of adults to ouabain exposure is qualitatively scored on a scale from highest = “+++” to lowest = “+”.
